# Supplementary material
Source: PubMed Central journal article supplement (PMC3429335)
Supplement: NIHMS395346-supplement-appendix.pdf [file NIHMS395346-supplement-appendix.pdf]

## Supplementary Appendix

This appendix has been provided by the authors to give readers additional information about their work.

Supplement to: Wilt TJ, Brawer MK, Jones KM, et al. Radical prostatectomy versus observation for localized prostate cancer. *N Engl J Med* 2012;367:203-13. DOI: 10.1056/NEJMoa1113162

## Table of Contents

### Tables

|                                                                                        |    |
|----------------------------------------------------------------------------------------|----|
| Table S1. Baseline Characteristics.....                                                | 2  |
| Table S2. Surgical Approach .....                                                      |    |
| Table S3. Cause of Death .....                                                         | 3  |
| Table S4. All Cause Mortality - Cumulative Incidence: Overall & Subgroup Findings..... | 4  |
| Table S5. Prostate Cancer Mortality – Cumulative Incidence .....                       | 8  |
| Table S6. Bone Metastases: Cumulative Incidence .....                                  | 12 |

### Figures

|                                                                           |    |
|---------------------------------------------------------------------------|----|
| Figure S1. Bone Metastases: All Patients .....                            | 16 |
| Figure S2a. All-cause mortality: PSA $\leq$ 10ng/mL .....                 | 17 |
| Figure S2b. All-cause mortality: PSA > 10 ng/mL .....                     | 17 |
| Figure S2c. All-cause mortality by Risk Category: Low Risk .....          | 18 |
| Figure S2d. All-cause mortality by Risk Category: Intermediate Risk ..... | 18 |
| Figure S2e. All-cause mortality by Risk Category: High Risk .....         | 18 |
| Figure S3a. Prostate Cancer mortality: PSA $\leq$ 10ng/mL .....           | 19 |
| Figure S3b. Prostate Cancer mortality: PSA > 10 ng/mL.....                | 19 |
| Figure S3c. Prostate Cancer by Risk Category: Low Risk .....              | 20 |
| Figure S3d. Prostate Cancer by Risk Category: Intermediate Risk .....     | 20 |
| Figure S3e. Prostate Cancer by Risk Category: High Risk .....             | 20 |

|               |    |
|---------------|----|
| Legends ..... | 21 |
|---------------|----|

|                  |    |
|------------------|----|
| References ..... | 22 |
|------------------|----|

|                         |    |
|-------------------------|----|
| PIVOT Study Group ..... | 25 |
|-------------------------|----|

**Table S1: Baseline Characteristics**

|                                          | Observation<br>(n=367) | RP (n=364) | p-value |
|------------------------------------------|------------------------|------------|---------|
| <b>MEAN AGE</b> years (SD)               | 66.8 (5.6)             | 67.0 (5.2) | .60     |
| <b>AGE GROUPING (%)</b>                  |                        |            | .61     |
| 40-49 years                              | 3 (0.8)                | 1 (0.3)    |         |
| 50-59 years                              | 32 (8.7)               | 39 (10.7)  |         |
| 60-69 years                              | 211 (57.5)             | 203 (55.8) |         |
| 70-75 years                              | 121 (33.0)             | 121 (33.2) |         |
| <b>RACE (%)</b>                          |                        |            | .53     |
| Black                                    | 121 (33.0)             | 111 (30.5) |         |
| White                                    | 220 (60.0)             | 232 (63.7) |         |
| Other                                    | 26 (7.1)               | 21 (5.8)   |         |
| <b>ACTIVITIES OF DAILY LIVING (%)</b>    |                        |            | .17     |
| Fully Active                             | 310 (84.5)             | 312 (85.7) |         |
| Ambulatory                               | 52 (14.2)              | 41 (11.3)  |         |
| No Work / Self Care / Confined           | 5 (1.4)                | 11 (3.0)   |         |
| <b>SMOKING (%)</b>                       |                        |            | .63     |
| Current Smoker                           | 106 (28.9)             | 96 (26.4)  |         |
| <b>HISTORY / CURRENT (%)</b>             |                        |            |         |
| Myocardial Infarction                    | 43 (11.7)              | 37 (10.2)  | .50     |
| Congestive Heart Failure                 | 8 (2.2)                | 3 (0.8)    | .13     |
| Peripheral Vascular Disease              | 20 (5.5)               | 15 (4.1)   | .43     |
| Cerebral Vascular Disease                | 16 (4.4)               | 7 (1.9)    | .06     |
| Stroke                                   | 18 (4.9)               | 14 (3.9)   | .48     |
| Diabetes                                 | 59 (16.1)              | 56 (15.4)  | .80     |
| Chronic Obstructive<br>Pulmonary Disease | 25 (6.8)               | 37 (10.2)  | .10     |
| Urinary Incontinence                     | 15 (4.6)               | 29 (8.9)   | .03     |
| Erectile Dysfunction                     | 104 (32.3)             | 107 (32.5) | .95     |
| Bowel Dysfunction                        | 29 (10.4)              | 18 (6.3)   | .08     |
| <b>CHARLSON COMORBIDITY SCORE (%)#</b>   |                        |            | .20     |
| Score = 0                                | 204 (55.6)             | 206 (56.6) |         |
| Score = 1                                | 103 (28.1)             | 108 (29.7) |         |
| Score = 2 or more                        | 60 (16.4)              | 47 (12.9)  |         |
| <b>TUMOR CHARACTERISTICS</b>             |                        |            |         |
| PSA (ng/ml): Mean (SD)                   | 10.2 (7.9)             | 10.1 (7.4) | .89     |
| Median                                   | 7.7                    | 7.9        |         |
| <b>PSA Categories (%)</b>                |                        |            | .89     |
| <4.0                                     | 40 (10.9)              | 42 (11.5)  |         |
| 4.0 – 10.0                               | 201 (54.8)             | 196 (53.9) |         |
| 10.1 – 19.9                              | 88 (24.0)              | 88 (24.2)  |         |
| 20.0 – 49.9                              | 37 (10.1)              | 38 (10.4)  |         |

|                                |            |            |     |
|--------------------------------|------------|------------|-----|
| Clinical Stage (%)             |            |            | .38 |
| TX                             | 1 (0.3)    | 1 (0.3)    |     |
| T1A (A1)                       | 11 (3.0)   | 4 (1.1)    |     |
| T1B (A2)                       | 9 (2.5)    | 5 (1.4)    |     |
| T1C                            | 183 (49.9) | 185 (50.8) |     |
| T2A (B1)                       | 85 (23.2)  | 96 (26.4)  |     |
| T2B (B2)                       | 44 (12.0)  | 47 (12.9)  |     |
| T2C                            | 33 (9.0)   | 24 (6.6)   |     |
| T3C                            | 0 (0.0)    | 1 (0.3)    |     |
| Gleason Score (%)              |            |            | .41 |
| ≤ 4                            | 75 (20.4)  | 82 (22.5)  |     |
| 5-6                            | 186 (50.7) | 172 (47.3) |     |
| 7                              | 64 (17.4)  | 69 (19.0)  |     |
| 8-10                           | 22 (6.0)   | 29 (8.0)   |     |
| Mean Gleason Score (SD)        | 5.7 (1.4)  | 5.6 (1.4)  | .80 |
| Histologic Grade (%)*          |            |            | .66 |
| Well Differentiated            | 75 (20.4)  | 82 (22.5)  |     |
| Moderately Well Differentiated | 261 (71.1) | 247 (67.9) |     |
| Poorly Differentiated          | 22 (6.0)   | 29 (8.0)   |     |
| Unknown                        | 5 (1.4)    | 4 (1.1)    |     |
| Tumor Risk Category (%)**      |            |            | .37 |
| Low risk                       | 148 (40.3) | 148 (40.7) |     |
| Intermediate risk              | 120 (32.7) | 129 (35.4) |     |
| High risk                      | 80 (21.8)  | 77 (21.2)  |     |

# Charlson Comorbidity Score was calculated based on a point weighting derived for current or past history of the following (points for each condition are shown in parentheses): myocardial infarction (1); chronic congestive heart failure (2); peripheral vascular disease (1); cerebrovascular disease or stroke (1); diabetes (1), with end-organ damage (additional 1 point); dementia (3); chronic pulmonary disease (2); mild

liver disease (2), moderate or severe liver disease (4); moderate or severe renal disease (3); cancer other than skin, prostate or non-invasive bladder cancer (leukemia, lymphoma, other cancers (2); metastatic solid tumor (6); acquired immune deficiency syndrome (4).

\* Well differentiated = Gleason Score <4; Moderately Well Differentiated = Gleason Score 5-7; Poorly Differentiated = Gleason Score 8-10 based on local site histology.

\*\* Low risk = Gleason Score  $\leq$  6, PSA  $\leq$  10 and Tumor Stage T1a, T1b, T1c or T2a; Intermediate risk = PSA 10.1-20 ng/mL or Gleason score = 7 or Stage T2b; High risk = PSA > 20 ng/mL or Gleason score 8-10 or Stage T2c. Four percent of men had insufficient information to determine tumor risk category score  
Table S1: Baseline Characteristics

\* Well differentiated = Gleason Score <4; Moderately Well Differentiated = Gleason Score 5-7; Poorly Differentiated = Gleason Score 8-10 based on local site histology.

# Low risk = Gleason Score  $\leq$  6, PSA  $\leq$  10 and Tumor Stage T1a, T1b, T1c or T2a; Intermediate risk = PSA 10.1-20 ng/mL or Gleason score = 7 or Stage T2b; High risk = PSA > 20 ng/mL or Gleason score 8-10 or Stage T2c. Four percent of men had insufficient information to determine tumor risk category scores.

Table S2: Surgical Approach, Type, Adequacy and Reasons for Refusal among Men Randomized to Radical Prostatectomy

|                                                   |            |
|---------------------------------------------------|------------|
| <b>Radical Prostatectomy Approach (N=281 RP)</b>  |            |
| Retropubic                                        | 239 (85.1) |
| Perineal                                          | 41 (14.6)  |
| Unknown                                           | 1 (0.4)    |
| <b>Pelvic Lymph Node Dissection</b>               | 230        |
| Nodes Resected                                    | 220 (95.7) |
| Nodal Status Positive                             | 9 (3.9)    |
| Unknown                                           | 1 (0.4)    |
| <b>Radical Prostatectomy-Use of nerve sparing</b> |            |
| Non-nerve sparing                                 | 167 (59.4) |
| Nerve Sparing: Unilateral                         | 47 (16.7)  |
| Nerve Sparing: Bilateral                          | 61 (21.7)  |
| Unknown                                           | 6 (2.1)    |
| <b>Pathologic Extent of Prostate Cancer*</b>      |            |
| <i>Confined to Prostate</i>                       | 150 (53.4) |
| Low Risk (N=114)                                  | 75 (65.8)  |
| Intermediate Risk (N=103)                         | 52 (50.5)  |
| High Risk (N=59)                                  | 21 (35.6)  |
| <i>Capsular invasion</i>                          | 28 (10.0)  |
| <i>Capsular penetration</i>                       | 16 (5.7)   |
| <i>Surgical margins involved</i>                  | 64 (22.8)  |
| Low Risk (n=114)                                  | 20 (17.5)  |
| Intermediate Risk (n=103)                         | 32 (31.1)  |
| High Risk (n=59)                                  | 10 (17.0)  |
| <i>Seminal vesicle invasion</i>                   | 21 (7.5)   |
| <i>Unknown</i>                                    | 2 (0.7)    |
| <b>Radical Prostatectomy Not performed</b>        | 83 (22.8)  |
| Patient refusal                                   | 65 (78.3)  |
| Physician recommendation                          | 1 (1.2)    |
| High surgical risk                                | 5 (6.0)    |
| Prostate cancer not localized                     | 6 (7.2)    |
| Patient died prior to surgery                     | 3 (3.6)    |
| Unknown                                           | 3 (3.6)    |

\* In five patients risk categorization was not possible.

Table S3: Cause of death

|                                         |                                                          | RP<br>(n=171) | Observation<br>(n=183) |
|-----------------------------------------|----------------------------------------------------------|---------------|------------------------|
| <b>Cause of Death</b>                   |                                                          |               |                        |
|                                         | Definitely <u>not</u> due to prostate cancer             | 127 (74.3%)   | 123 (67.2%)            |
|                                         | Probably <u>not</u> due to prostate cancer               | 22 (12.9%)    | 29 (15.8%)             |
|                                         | Probably due to prostate cancer                          | 3 (1.8%)      | 13 (7.1%)              |
|                                         | Definitely due to prostate cancer                        | 15 (8.8%)     | 18 (9.8%)              |
|                                         | Probably due to prostate cancer treatment                | 2 (1.2%)      | 0                      |
|                                         | Definitely due to prostate cancer treatment              | 1 (0.6%)      | 0                      |
|                                         | Unknown                                                  | 1 (0.6%)      | 0                      |
| <b>Combined cause of death outcomes</b> |                                                          |               |                        |
|                                         | Definitely OR Probably <u>not</u> due to prostate cancer | 148 (87.0%)   | 152 (83.1%)            |
|                                         | Definitely OR Probably due to prostate cancer            | 18 (10.6%)    | 31 (16.9%)             |
|                                         | Definitely OR Probably due to prostate cancer treatment  | 3 (1.8%)      | 0                      |
|                                         | Unknown                                                  | 1 (0.6%)      | 0                      |

Table S4: All cause mortality Cumulative Incidence: Overall and Subgroup Findings

| All-Cause Mortality                         | Cumulative Incidence  |                     |             |                     | Absolute risk reduction<br>% (95% CI) | Relative risk (95% CI) | p-value |
|---------------------------------------------|-----------------------|---------------------|-------------|---------------------|---------------------------------------|------------------------|---------|
|                                             | Radical prostatectomy |                     | Observation |                     |                                       |                        |         |
|                                             | No.                   | % (95% CI)          | No.         | % (95% CI)          |                                       |                        |         |
| Overall                                     | 171                   | 47.0 (41.9 to 52.1) | 183         | 49.9 (44.8 to 55.0) | 2.9 (-4.3 to 10.1)                    | 0.94 (0.81 to 1.09)    | 0.22    |
| All ages, 4 y                               |                       | 9.6 (7.0 to 13.1)   |             | 14.2 (11.0 to 18.1) | 4.6 (-0.2 to 9.3)                     | 0.68 (0.45 to 1.02)    |         |
| All ages, 8 y                               |                       | 26.7 (22.4 to 31.4) |             | 29.7 (25.3 to 34.6) | 3.1 (-3.5 to 9.5)                     | 0.90 (0.71 to 1.13)    |         |
| All ages, 12 y                              |                       | 40.9 (36.0 to 46.1) |             | 43.9 (38.9 to 49.0) | 2.9 (-4.2 to 10.0)                    | 0.93 (0.79 to 1.11)    |         |
| Patient Characteristic<br>Derived Subgroups |                       |                     |             |                     |                                       |                        |         |
| Age < 65                                    | 43                    | 35.3 (27.3 to 44.1) | 50          | 38.2 (27.3 to 44.1) | 2.9 (-8.9 to 14.6)                    | 0.92 (0.67 to 1.28)    | 0.58    |
| Age < 65, 4 y                               |                       | 9.8 (5.7 to 16.4)   |             | 9.2 (5.3 to 15.3)   | -0.7 (-8.3 to 6.7)                    | 1.07 (0.50 to 2.30)    |         |
| Age < 65, 8 y                               |                       | 22.1 (15.7 to 30.3) |             | 20.6 (14.6 to 28.3) | -1.5 (-11.7 to 8.5)                   | 1.07 (0.67 to 1.72)    |         |
| Age < 65, 12 y                              |                       | 32.0 (24.4 to 40.7) |             | 31.3 (24.0 to 39.7) | -0.7 (-12.1 to 10.7)                  | 1.02 (0.71 to 1.47)    |         |
| Age ≥ 65                                    | 128                   | 52.9 (46.6 to 59.1) | 133         | 56.4 (50.0 to 62.5) | 3.5 (-5.4 to 12.3)                    | 0.94 (0.80 to 1.11)    | 0.17    |
| Age ≥ 65, 4 y                               |                       | 9.5 (6.4 to 13.9)   |             | 17.0 (12.7 to 22.3) | 7.5 (1.4 to 13.6)                     | 0.56 (0.35 to 0.91)    |         |
| Age ≥ 65, 8 y                               |                       | 28.9 (23.6 to 34.9) |             | 34.8 (29.0 to 41.0) | 5.8 (-2.5 to 14.1)                    | 0.83 (0.64 to 1.08)    |         |
| Age ≥ 65, 12 y                              |                       | 45.5 (39.3 to 51.8) |             | 50.9 (44.5 to 57.2) | 5.4 (-3.5 to 14.2)                    | 0.89 (0.74 to 1.08)    |         |
| Race – White                                | 117                   | 50.4 (44.0 to 56.8) | 119         | 54.1 (47.5 to 60.6) | 3.7 (-5.5 to 12.7)                    | 0.93 (0.78 to 1.11)    | 0.18    |
| Race – White, 4 y                           |                       | 9.9 (6.7 to 14.4)   |             | 14.1 (10.1 to 19.3) | 4.2 (-1.9 to 10.3)                    | 0.70 (0.42 to 1.17)    |         |
| Race – White, 8 y                           |                       | 28.0 (22.6 to 34.1) |             | 30.5 (24.8 to 36.8) | 2.4 (-5.9 to 10.8)                    | 0.92 (0.69 to 1.23)    |         |
| Race – White, 12 y                          |                       | 42.2 (36.1 to 48.7) |             | 45.0 (38.6 to 51.6) | 2.8 (-6.3 to 11.8)                    | 0.94 (0.76 to 1.16)    |         |
| Race – Black                                | 46                    | 41.4 (32.7 to 50.7) | 53          | 43.8 (35.3 to 52.7) | 2.4 (-10.3 to 14.8)                   | 0.95 (0.70 to 1.28)    | 0.70    |
| Race – Black, 4 y                           |                       | 9.9 (5.6 to 16.9)   |             | 14.9 (9.6 to 22.3)  | 5.0 (-3.8 to 13.5)                    | 0.67 (0.33 to 1.35)    |         |
| Race – Black, 8 y                           |                       | 26.1 (18.9 to 35.0) |             | 29.8 (22.3 to 38.4) | 3.6 (-7.9 to 14.9)                    | 0.88 (0.58 to 1.33)    |         |
| Race – Black, 12 y                          |                       | 39.6 (31.0 to 48.9) |             | 42.2 (33.7 to 51.1) | 2.5 (-10.0 to 14.9)                   | 0.94 (0.69 to 1.28)    |         |
| Race – Other                                | 8                     | 38.1 (20.8 to 59.1) | 11          | 42.3 (25.5 to 61.1) | 4.2 (-22.7 to 29.8)                   | 0.90 (0.44 to 1.82)    | 0.72    |
| Race – Other, 4 y                           |                       | 4.8 (0.9 to 22.7)   |             | 11.5 (4.0 to 29.0)  | 6.8 (-12.7 to 24.7)                   | 0.41 (0.05 to 3.68)    |         |
| Race – Other, 8 y                           |                       | 14.3 (5.0 to 34.6)  |             | 23.1 (11.0 to 42.1) | 8.8 (-14.9 to 29.9)                   | 0.62 (0.18 to 2.18)    |         |
| Race – Other, 12 y                          |                       | 33.3 (17.2 to 54.6) |             | 42.3 (25.5 to 61.1) | 9.0 (-18.1 to 33.7)                   | 0.79 (0.37 to 1.67)    |         |
| Charlson Score = 0                          | 82                    | 36.6 (30.6 to 43.1) | 86          | 39.1 (32.9 to 45.7) | 2.5 (-6.5 to 11.4)                    | 0.94 (0.74 to 1.19)    | 0.48    |
| Charlson = 0, 4 y                           |                       | 7.6 (4.8 to 11.8)   |             | 10.0 (6.7 to 14.7)  | 2.4 (-3.0 to 7.9)                     | 0.76 (0.41 to 1.39)    |         |



| All-Cause Mortality                    | Cumulative Incidence  |                     |             |                     | Absolute risk reduction<br>% (95% CI) | Relative risk (95% CI) | p-value |
|----------------------------------------|-----------------------|---------------------|-------------|---------------------|---------------------------------------|------------------------|---------|
|                                        | Radical prostatectomy |                     | Observation |                     |                                       |                        |         |
|                                        | No.                   | % (95% CI)          | No.         | % (95% CI)          |                                       |                        |         |
| Charlson = 0, 8 y                      |                       | 21.9 (17.0 to 27.7) |             | 24.1 (18.9 to 30.2) | 2.2 (-5.6 to 10.0)                    | 0.91 (0.65 to 1.28)    |         |
| Charlson = 0, 12 y                     |                       | 30.8 (25.1 to 37.1) |             | 33.6 (27.7 to 40.1) | 2.8 (-5.8 to 11.5)                    | 0.92 (0.70 to 1.20)    |         |
| Charlson Score ≥ 1                     | 89                    | 63.6 (55.3 to 71.1) | 97          | 66.0 (58.0 to 73.2) | 2.4 (-8.5 to 13.3)                    | 0.96 (0.81 to 1.14)    | 0.25    |
| Charlson ≥ 1, 4 y                      |                       | 12.9 (8.3 to 19.4)  |             | 20.4 (14.7 to 27.6) | 7.6 (-1.2 to 16.1)                    | 0.63 (0.37 to 1.08)    |         |
| Charlson ≥ 1, 8 y                      |                       | 34.3 (26.9 to 42.5) |             | 38.1 (30.6 to 46.2) | 3.8 (-7.3 to 14.7)                    | 0.90 (0.66 to 1.23)    |         |
| Charlson ≥ 1, 12 y                     |                       | 57.1 (48.9 to 65.0) |             | 59.2 (51.1 to 66.8) | 2.0 (-9.3 to 13.3)                    | 0.97 (0.79 to 1.18)    |         |
| Perf Status = 0                        | 139                   | 44.6 (39.1 to 50.1) | 146         | 47.1 (41.6 to 52.7) | 2.6 (-5.3 to 10.3)                    | 0.95 (0.80 to 1.12)    | 0.34    |
| Perf Status = 0, 4 y                   |                       | 8.7 (6.0 to 12.3)   |             | 11.9 (8.8 to 16.0)  | 3.3 (-1.5 to 8.1)                     | 0.73 (0.45 to 1.16)    |         |
| Perf Status = 0, 8 y                   |                       | 24.4 (19.9 to 29.4) |             | 26.5 (21.9 to 31.6) | 2.1 (-4.7 to 8.9)                     | 0.92 (0.70 to 1.21)    |         |
| Perf Status = 0, 12 y                  |                       | 38.5 (33.2 to 44.0) |             | 40.0 (34.7 to 45.6) | 1.5 (-6.1 to 9.2)                     | 0.96 (0.79 to 1.17)    |         |
| Perf Status = 1 – 4                    | 32                    | 61.5 (48.0 to 73.5) | 37          | 64.9 (51.9 to 76.0) | 3.3 (-14.3 to 20.9)                   | 0.95 (0.71 to 1.26)    | 0.40    |
| Perf Status = 1-4, 4y                  |                       | 15.4 (8.0 to 27.5)  |             | 26.3 (16.7 to 39.0) | 10.9 (-4.6 to 25.6)                   | 0.58 (0.27 to 1.26)    |         |
| Perf Status = 1-4, 8y                  |                       | 40.4 (28.2 to 53.9) |             | 47.4 (35.0 to 60.1) | 7.0 (-11.4 to 24.6)                   | 0.85 (0.56 to 1.31)    |         |
| Perf Status = 1-4,<br>12y              |                       | 55.8 (42.3 to 68.4) |             | 64.9 (51.9 to 76.0) | 9.1 (-9.0 to 26.6)                    | 0.86 (0.63 to 1.17)    |         |
| Tumor Characteristic Derived Subgroups |                       |                     |             |                     |                                       |                        |         |
| PSA ≤ 10                               | 110                   | 46.2 (40.0 to 52.6) | 105         | 43.6 (37.5 to 49.9) | -2.7 (-11.5 to 6.2)                   | 1.06 (0.87 to 1.29)    | 0.82    |
| PSA ≤ 10, 4 y                          |                       | 9.4 (6.2 to 13.6)   |             | 12.0 (8.5 to 16.8)  | 2.8 (-2.8 to 8.4)                     | 0.77 (0.45 to 1.30)    |         |
| PSA ≤ 10, 8 y                          |                       | 25.6 (20.5 to 31.5) |             | 27.4 (22.1 to 33.3) | 1.8 (-6.1 to 9.6)                     | 0.94 (0.69 to 1.26)    |         |
| PSA ≤ 10, 12 y                         |                       | 40.8 (34.7 to 47.1) |             | 38.2 (32.3 to 44.5) | -2.6 (-11.3 to 6.1)                   | 1.07 (0.86 to 1.33)    |         |
| PSA > 10                               | 61                    | 48.4 (39.9 to 57.1) | 77          | 61.6 (52.9 to 69.7) | 13.2 (0.9 to 24.9)                    | 0.79 (0.63 to 0.99)    | 0.02    |
| PSA > 10, 4 y                          |                       | 10.3 (6.1 to 16.9)  |             | 17.6 (11.9 to 25.2) | 7.3 (-1.4 to 16.0)                    | 0.59 (0.31 to 1.11)    |         |
| PSA > 10, 8 y                          |                       | 28.6 (21.4 to 37.0) |             | 33.6 (25.9 to 42.3) | 5.0 (-6.4 to 16.3)                    | 0.85 (0.59 to 1.23)    |         |
| PSA > 10, 12 y                         |                       | 41.3 (33.1 to 50.0) |             | 54.4 (45.7 to 62.9) | 13.1 (0.8 to 24.9)                    | 0.76 (0.58 to 0.99)    |         |
| Risk – Low (Local)                     | 62                    | 41.9 (34.3 to 50.0) | 54          | 36.5 (29.2 to 44.5) | -5.4 (-16.3 to 5.7)                   | 1.15 (0.86 to 1.53)    | 0.45    |
| Risk – Low, 4 y                        |                       | 8.8 (5.2 to 14.4)   |             | 10.1 (6.2 to 16.1)  | 1.4 (-5.5 to 8.3)                     | 0.87 (0.43 to 1.76)    |         |
| Risk – Low, 8 y                        |                       | 25.0 (18.7 to 32.6) |             | 21.0 (15.2 to 28.2) | -4.1 (-13.6 to 5.5)                   | 1.19 (0.78 to 1.82)    |         |
| Risk – Low, 12 y                       |                       | 37.2 (29.8 to 45.2) |             | 31.8 (24.8 to 39.6) | -5.4 (-16.0 to 5.4)                   | 1.17 (0.85 to 1.60)    |         |

| All-Cause Mortality   | Cumulative Incidence  |                     |             |                     | Absolute risk reduction<br>% (95% CI) | Relative risk (95% CI) | p-value |
|-----------------------|-----------------------|---------------------|-------------|---------------------|---------------------------------------|------------------------|---------|
|                       | Radical prostatectomy |                     | Observation |                     |                                       |                        |         |
|                       | No.                   | % (95% CI)          | No.         | % (95% CI)          |                                       |                        |         |
| Risk – Int (Local)    | 59                    | 45.7 (37.4 to 54.3) | 70          | 58.3 (49.4 to 66.8) | 12.6 (0.2 to 24.5)                    | 0.78 (0.62 to 1.00)    | 0.037   |
| Risk – Int, 4 y       |                       | 7.8 (4.3 to 13.7)   |             | 14.2 (9.0 to 21.5)  | 6.4 (-1.4 to 14.6)                    | 0.55 (0.26 to 1.15)    |         |
| Risk – Int, 8 y       |                       | 22.5 (16.1 to 30.4) |             | 31.7 (24.0 to 40.4) | 9.2 (-1.8 to 20.0)                    | 0.71 (0.47 to 1.07)    |         |
| Risk – Int, 12 y      |                       | 37.2 (29.4 to 45.8) |             | 50.0 (41.2 to 58.8) | 12.8 (0.5 to 24.6)                    | 0.74 (0.56 to 0.99)    |         |
| Risk – High (Local)   | 42                    | 54.6 (43.5 to 65.2) | 49          | 61.3 (50.3 to 71.2) | 6.7 (-8.6 to 21.6)                    | 0.89 (0.68 to 1.16)    | 0.16    |
| Risk – High, 4 y      |                       | 13.0 (7.2 to 22.3)  |             | 20.0 (12.7 to 30.1) | 7.0 (-4.8 to 18.6)                    | 0.65 (0.31 to 1.34)    |         |
| Risk – High, 8 y      |                       | 35.1 (25.4 to 46.2) |             | 41.3 (31.1 to 52.2) | 6.2 (-8.9 to 20.8)                    | 0.85 (0.57 to 1.27)    |         |
| Risk – High, 12 y     |                       | 50.7 (39.7 to 61.5) |             | 57.5 (46.6 to 67.7) | 6.9 (-8.6 to 21.8)                    | 0.88 (0.66 to 1.18)    |         |
| Risk – Low (Central)  | 45                    | 40.5 (31.9 to 49.8) | 47          | 38.5 (30.4 to 47.4) | -2.0 (-14.4 to 10.4)                  | 1.05 (0.77 to 1.45)    | 0.72    |
| Risk – Low, 4 y       |                       | 8.1 (4.3 to 14.7)   |             | 9.8 (5.7 to 16.4)   | 1.7 (-6.0 to 9.3)                     | 0.82 (0.36 to 1.88)    |         |
| Risk – Low, 8 y       |                       | 26.1 (18.9 to 35.0) |             | 23.0 (16.4 to 31.2) | -3.2 (-14.2 to 7.8)                   | 1.14 (0.73 to 1.79)    |         |
| Risk – Low, 12 y      |                       | 35.1 (26.9 to 44.4) |             | 32.8 (25.1 to 41.5) | -2.4 (-14.4 to 9.7)                   | 1.07 (0.75 to 1.53)    |         |
| Risk – Int (Central)  | 74                    | 47.4 (40.0 to 55.6) | 73          | 52.5 (44.3 to 60.6) | 4.8 (-6.6 to 16.0)                    | 0.91 (0.72 to 1.14)    | 0.29    |
| Risk – Int, 4 y       |                       | 9.7 (6.0 to 15.4)   |             | 15.1 (10.1 to 22.0) | 5.4 (-2.1 to 13.3)                    | 0.64 (0.34 to 1.19)    |         |
| Risk – Int, 8 y       |                       | 23.9 (17.8 to 31.2) |             | 29.5 (22.6 to 37.6) | 5.6 (-4.5 to 15.7)                    | 0.81 (0.55 to 1.18)    |         |
| Risk – Int, 12 y      |                       | 39.4 (32.0 to 47.2) |             | 45.3 (37.3 to 53.6) | 6.0 (-5.3 to 17.0)                    | 0.87 (0.66 to 1.13)    |         |
| Risk – High (Central) | 43                    | 55.1 (44.1 to 65.7) | 50          | 58.8 (48.2 to 68.7) | 3.7 (-11.3 to 18.5)                   | 0.94 (0.72 to 1.23)    | 0.25    |
| Risk – High, 4 y      |                       | 11.5 (6.2 to 20.5)  |             | 17.7 (11.0 to 27.1) | 6.1 (-5.1 to 17.0)                    | 0.65 (0.30 to 1.41)    |         |
| Risk – High, 8 y      |                       | 34.6 (25.0 to 45.7) |             | 38.8 (29.2 to 49.5) | 4.2 (-10.5 to 18.5)                   | 0.89 (0.59 to 1.34)    |         |
| Risk – High, 12 y     |                       | 51.3 (40.4 to 62.1) |             | 56.5 (45.9 to 66.5) | 5.2 (-9.9 to 20.0)                    | 0.91 (0.68 to 1.21)    |         |
| Gleason (Local) < 7   | 113                   | 44.5 (38.5 to 50.6) | 125         | 47.9 (41.9 to 53.9) | 3.4 (-5.2 to 11.9)                    | 0.93 (0.77 to 1.12)    | 0.26    |
| Gleason < 7, 4 y      |                       | 8.7 (5.8 to 12.8)   |             | 13.8 (10.1 to 18.5) | 5.1 (-0.4 to 10.7)                    | 0.63 (0.38 to 1.04)    |         |
| Gleason < 7, 8 y      |                       | 25.2 (20.3 to 30.9) |             | 28.4 (23.2 to 34.1) | 3.2 (-4.5 to 10.7)                    | 0.89 (0.67 to 1.18)    |         |
| Gleason < 7, 12 y     |                       | 38.6 (32.8 to 44.7) |             | 42.2 (36.3 to 48.2) | 3.6 (-4.9 to 11.9)                    | 0.92 (0.74 to 1.13)    |         |
| Gleason (Local) ≥ 7   | 50                    | 51.0 (41.3 to 60.7) | 47          | 54.7 (44.2 to 64.8) | 3.6 (-10.6 to 17.7)                   | 0.93 (0.71 to 1.23)    | 0.38    |
| Gleason ≥ 7, 4 y      |                       | 11.2 (6.4 to 19.0)  |             | 14.0 (8.2 to 22.8)  | 2.7 (-7.0 to 12.8)                    | 0.80 (0.37 to 1.73)    |         |
| Gleason ≥ 7, 8 y      |                       | 29.6 (21.5 to 39.3) |             | 31.4 (22.6 to 41.8) | 1.8 (-11.3 to 15.0)                   | 0.94 (0.61 to 1.46)    |         |
| Gleason ≥ 7, 12 y     |                       | 44.9 (35.4 to 54.8) |             | 48.8 (38.6 to 59.2) | 3.9 (-10.3 to 18.0)                   | 0.92 (0.68 to 1.25)    |         |
| Gleason (Central) < 7 | 69                    | 41.1 (33.9 to 48.6) | 88          | 44.9 (38.1 to 51.9) | 3.8 (-6.3 to 13.8)                    | 0.91 (0.72 to 1.16)    | 0.63    |

| All-Cause Mortality   | Cumulative Incidence  |                     |             |                     | Absolute risk reduction<br>% (95% CI) | Relative risk (95% CI) | p-value |
|-----------------------|-----------------------|---------------------|-------------|---------------------|---------------------------------------|------------------------|---------|
|                       | Radical prostatectomy |                     | Observation |                     |                                       |                        |         |
|                       | No.                   | % (95% CI)          | No.         | % (95% CI)          |                                       |                        |         |
| Gleason < 7, 4 y      |                       | 7.7 (4.6 to 12.8)   |             | 12.2 (8.4 to 17.6)  | 4.5 (-1.9 to 10.7)                    | 0.63 (0.33 to 1.20)    |         |
| Gleason < 7, 8 y      |                       | 27.4 (21.2 to 34.6) |             | 25.0 (19.5 to 31.5) | -2.4 (-11.5 to 6.6)                   | 1.10 (0.78 to 1.55)    |         |
| Gleason < 7, 12 y     |                       | 35.7 (28.9 to 43.2) |             | 37.8 (31.3 to 44.7) | 2.0 (-7.9 to 11.8)                    | 0.95 (0.72 to 1.24)    |         |
| Gleason (Central) ≥ 7 | 92                    | 52.9 (45.5 to 60.2) | 81          | 54.7 (46.7 to 62.5) | 1.9 (-9.0 to 12.6)                    | 0.97 (0.79 to 1.18)    | 0.14    |
| Gleason ≥ 7, 4 y      |                       | 11.5 (7.6 to 17.1)  |             | 15.5 (10.6 to 22.2) | 4.1 (-3.4 to 11.8)                    | 0.74 (0.42 to 1.29)    |         |
| Gleason ≥ 7, 8 y      |                       | 26.4 (20.4 to 33.5) |             | 35.1 (27.9 to 43.1) | 8.7 (-1.4 to 18.7)                    | 0.75 (0.54 to 1.05)    |         |
| Gleason ≥ 7, 12 y     |                       | 45.4 (38.2 to 52.8) |             | 51.4 (43.4 to 59.3) | 6.0 (-5.0 to 16.7)                    | 0.88 (0.71 to 1.11)    |         |

**\*P value:** from log-rank test for survival analysis

**Risk Status:** Low risk = PSA ≤ 10; Gleason histological score ≤ 6; tumor stage T1, T2a; Intermediate risk = PSA > 10 ≤ 20; Gleason score = 7; Stage T2b; High Risk = not low or intermediate risk but still clinically localized.

**Y = year; Perf=** Performance Status: 0= Fully Active; 1 = Symptoms but ambulatory and able to do light work, 2 = No work but self care and active 50% of waking hours, 3 = Limited self care, confined to bed or chair > 50% of waking hours, 4 = Completely disabled.

Table S5: Prostate Cancer Mortality-Cumulative Incidence

| CAP-Specific Mortality                      | Cumulative Incidence  |                   |             |                    | Absolute risk reduction<br>% (95% CI) | Relative risk (95% CI) | p-value |
|---------------------------------------------|-----------------------|-------------------|-------------|--------------------|---------------------------------------|------------------------|---------|
|                                             | Radical prostatectomy |                   | Observation |                    |                                       |                        |         |
|                                             | No.                   | % (95% CI)        | No.         | % (95% CI)         |                                       |                        |         |
| Overall                                     | 21                    | 5.8 (3.8 to 8.7)  | 31          | 8.4 (6.0 to 11.7)  | 2.6 (-1.1 to 6.5)                     | 0.68 (0.40 to 1.17)    | 0.09    |
| All ages, 4 y                               |                       | 1.7 (0.8 to 3.6)  |             | 1.6 (0.8 to 3.5)   | 0 (-2.1 to 2.1)                       | 1.0 (0.33 to 3.10)     |         |
| All ages, 8 y                               |                       | 3.0 (1.7 to 5.3)  |             | 4.9 (3.1 to 7.6)   | 1.9 (-1.0 to 4.9)                     | 0.62 (0.30 to 1.29)    |         |
| All ages, 12 y                              |                       | 4.4 (2.7 to 7.0)  |             | 7.4 (5.1 to 10.5)  | 3.0 (-0.5 to 6.5)                     | 0.60 (0.33 to 1.09)    |         |
| Patient Characteristic<br>Derived Subgroups |                       |                   |             |                    |                                       |                        |         |
| Age < 65                                    | 6                     | 4.9 (2.3 to 10.3) | 12          | 9.2 (5.3 to 15.3)  | 4.2 (-2.4 to 11.0)                    | 0.54 (0.21 to 1.39)    | 0.19    |
| Age < 65, 4 y                               |                       | 1.6 (0.5 to 5.8)  |             | 0.8 (0.1 to 4.2)   | -0.9 (-5.1 to 2.8)                    | 2.15 (0.20 to 23.38)   |         |
| Age < 65, 8 y                               |                       | 3.3 (1.3 to 8.1)  |             | 4.6 (2.1 to 9.6)   | 1.3 (-4.1 to 6.7)                     | 0.72 (0.21 to 2.48)    |         |
| Age < 65, 12 y                              |                       | 4.1 (1.8 to 9.2)  |             | 7.6 (4.2 to 13.5)  | 3.5 (-2.6 to 9.8)                     | 0.54 (0.19 to 1.53)    |         |
| Age ≥ 65                                    | 15                    | 6.2 (3.8 to 10.0) | 19          | 8.1 (5.2 to 12.2)  | 1.9 (-2.9 to 6.7)                     | 0.77 (0.40 to 1.48)    | 0.25    |
| Age ≥ 65, 4 y                               |                       | 1.7 (0.6 to 4.2)  |             | 2.1 (0.9 to 4.9)   | 0.5 (-2.3 to 3.4)                     | 0.78 (0.21 to 2.87)    |         |
| Age ≥ 65, 8 y                               |                       | 2.9 (1.4 to 5.9)  |             | 5.1 (2.9 to 8.7)   | 2.2 (-1.5 to 6.1)                     | 0.57 (0.23 to 1.42)    |         |
| Age ≥ 65, 12 y                              |                       | 4.6 (2.6 to 8.0)  |             | 7.2 (4.6 to 11.2)  | 2.7 (-1.7 to 7.2)                     | 0.63 (0.30 to 1.32)    |         |
| Race – White                                | 15                    | 6.5 (4.0 to 10.4) | 22          | 10.0 (6.7 to 14.7) | 3.5 (-1.6 to 8.8)                     | 0.65 (0.34 to 1.21)    | 0.09    |
| Race – White, 4 y                           |                       | 2.2 (0.9 to 4.9)  |             | 1.8 (0.7 to 4.6)   | -0.3 (-3.3 to 2.7)                    | 1.19 (0.32 to 4.36)    |         |
| Race – White, 8 y                           |                       | 3.5 (1.8 to 6.7)  |             | 5.9 (3.5 to 9.9)   | 2.5 (-1.6 to 6.8)                     | 0.58 (0.25 to 1.38)    |         |
| Race – White, 12 y                          |                       | 4.3 (2.4 to 7.8)  |             | 9.1 (6.0 to 13.6)  | 4.8 (0.1 to 9.7)                      | 0.47 (0.23 to 0.99)    |         |
| Race – Black                                | 5                     | 4.5 (1.9 to 10.1) | 7           | 5.8 (2.8 to 11.5)  | 1.3 (-5.1 to 7.5)                     | 0.78 (0.25 to 2.38)    | 0.71    |
| Race – Black, 4 y                           |                       | 0.9 (0.2 to 4.9)  |             | 1.7 (0.5 to 5.8)   | 0.8 (-3.5 to 5.0)                     | 0.55 (0.05 to 5.93)    |         |
| Race – Black, 8 y                           |                       | 2.7 (0.9 to 7.7)  |             | 4.1 (1.8 to 9.3)   | 1.4 (-4.1 to 6.9)                     | 0.65 (0.16 to 2.67)    |         |
| Race – Black, 12 y                          |                       | 4.5 (1.9 to 10.1) |             | 4.1 (1.8 to 9.3)   | -0.4 (-6.5 to 5.4)                    | 1.09 (0.32 to 3.66)    |         |
| Race – Other                                | 1                     | 4.8 (0.9 to 22.7) | 2           | 7.7 (2.1 to 24.1)  | 2.9 (-15.8 to 19.8)                   | 0.62 (0.06 to 6.37)    | 0.63    |
| Race – Other, 4 y                           |                       | 0.0 (0.0 to 15.5) |             | 0.0 (0.0 to 12.9)  | 0.0 (-15.5 to 12.9)                   | -----                  |         |
| Race – Other, 8 y                           |                       | 0.0 (0.0 to 15.5) |             | 0.0 (0.0 to 12.9)  | 0.0 (-15.5 to 12.9)                   | -----                  |         |
| Race – Other, 12 y                          |                       | 4.8 (0.9 to 22.7) |             | 7.7 (2.1 to 24.1)  | 2.9 (-15.8 to 19.8)                   | 0.62 (0.06 to 6.37)    |         |
| Charlson Score = 0                          | 14                    | 6.3 (3.8 to 10.2) | 19          | 8.6 (5.6 to 13.1)  | 2.4 (-2.6 to 7.5)                     | 0.72 (0.37 to 1.41)    | 0.29    |
| Charlson = 0, 4 y                           |                       | 0.9 (0.3 to 3.2)  |             | 1.8 (0.7 to 4.6)   | 0.9 (-1.6 to 3.8)                     | 0.49 (0.09 to 2.65)    |         |

| CAP-Specific Mortality                    | Cumulative Incidence  |                   |             |                    | Absolute risk reduction<br>% (95% CI) | Relative risk (95% CI) | p-value |
|-------------------------------------------|-----------------------|-------------------|-------------|--------------------|---------------------------------------|------------------------|---------|
|                                           | Radical prostatectomy |                   | Observation |                    |                                       |                        |         |
|                                           | No.                   | % (95% CI)        | No.         | % (95% CI)         |                                       |                        |         |
| Charlson = 0, 8 y                         |                       | 2.2 (1.0 to 5.1)  |             | 5.9 (3.5 to 9.9)   | 3.7 (-0.1 to 7.8)                     | 0.38 (0.14 to 1.04)    |         |
| Charlson = 0, 12 y                        |                       | 4.5 (2.4 to 8.0)  |             | 7.7 (4.9 to 12.0)  | 3.3 (-1.3 to 8.0)                     | 0.58 (0.27 to 1.23)    |         |
| Charlson Score ≥ 1                        | 7                     | 5.0 (2.4 to 10.0) | 12          | 8.2 (4.7 to 13.7)  | 3.2 (-2.9 to 9.3)                     | 0.61 (0.25 to 1.51)    | 0.19    |
| Charlson ≥ 1, 4 y                         |                       | 2.9 (1.1 to 7.1)  |             | 1.4 (0.4 to 4.8)   | -1.5 (-5.9 to 2.4)                    | 2.10 (0.39 to 11.28)   |         |
| Charlson ≥ 1, 8 y                         |                       | 4.3 (2.0 to 9.0)  |             | 3.4 (1.5 to 7.7)   | -0.9 (-6.0 to 4.0)                    | 1.26 (0.39 to 4.04)    |         |
| Charlson ≥ 1, 12 y                        |                       | 4.3 (2.0 to 9.0)  |             | 6.8 (3.7 to 12.1)  | 2.5 (-3.1 to 8.3)                     | 0.63 (0.24 to 1.69)    |         |
| Perf Status = 0                           | 18                    | 5.8 (3.7 to 8.9)  | 25          | 8.1 (5.5 to 11.6)  | 2.3 (-1.8 to 6.4)                     | 0.72 (0.40 to 1.28)    | 0.19    |
| Perf Status = 0, 4 y                      |                       | 1.6 (0.7 to 3.7)  |             | 1.3 (0.5 to 3.3)   | -0.3 (-2.6 to 1.9)                    | 1.24 (0.34 to 4.58)    |         |
| Perf Status = 0, 8 y                      |                       | 2.9 (1.5 to 5.4)  |             | 4.2 (2.5 to 7.0)   | 1.3 (-1.7 to 4.5)                     | 0.69 (0.30 to 1.59)    |         |
| Perf Status = 0, 12 y                     |                       | 4.5 (2.7 to 7.4)  |             | 6.8 (4.5 to 10.1)  | 2.3 (-1.4 to 6.1)                     | 0.66 (0.34 to 1.28)    |         |
| Perf Status = 1-4                         | 3                     | 5.8 (2.0 to 15.6) | 6           | 10.5 (4.9 to 21.1) | 4.8 (-6.6 to 16.0)                    | 0.55 (0.14 to 2.08)    | 0.21    |
| Perf Status = 1-4, 4 y                    |                       | 1.9 (0.3 to 10.1) |             | 3.5 (1.0 to 11.9)  | 1.6 (-7.0 to 10.2)                    | 0.55 (0.05 to 5.87)    |         |
| Perf Status = 1-4, 8 y                    |                       | 3.9 (1.1 to 13.0) |             | 8.8 (3.8 to 18.9)  | 4.9 (-5.5 to 15.5)                    | 0.44 (0.09 to 2.16)    |         |
| Perf Status = 1-4, 12y                    |                       | 3.9 (1.1 to 13.0) |             | 10.5 (4.9 to 21.1) | 6.7 (-4.0 to 17.6)                    | 0.37 (0.08 to 1.73)    |         |
| Tumor Characteristic<br>Derived Subgroups |                       |                   |             |                    |                                       |                        |         |
| PSA ≤ 10                                  | 14                    | 5.9 (3.5 to 9.6)  | 15          | 6.2 (3.8 to 10.0)  | 0.3 (-4.1 to 4.8)                     | 0.95 (0.47 to 1.91)    | 0.82    |
| PSA ≤ 10, 4 y                             |                       | 2.1 (0.9 to 4.8)  |             | 2.1 (0.9 to 4.8)   | -0.0 (-3.0 to 2.9)                    | 1.01 (0.30 to 3.45)    |         |
| PSA ≤ 10, 8 y                             |                       | 3.4 (1.7 to 6.5)  |             | 3.7 (2.0 to 6.9)   | 0.4 (-3.2 to 4.0)                     | 0.90 (0.35 to 2.29)    |         |
| PSA ≤ 10, 12 y                            |                       | 4.6 (2.6 to 8.1)  |             | 5.4 (3.2 to 9.0)   | 0.8 (-3.3 to 4.9)                     | 0.86 (0.39 to 1.87)    |         |
| PSA > 10                                  | 7                     | 5.6 (2.7 to 11.0) | 16          | 12.8 (8.0 to 19.8) | 7.2 (-0.0 to 14.8)                    | 0.43 (0.18 to 1.02)    | 0.02    |
| PSA > 10, 4 y                             |                       | 0.8 (0.1 to 4.4)  |             | 0.8 (0.1 to 4.4)   | 0.0 (-3.6 to 3.7)                     | 0.99 (0.06 to 15.69)   |         |
| PSA > 10, 8 y                             |                       | 2.4 (0.8 to 6.8)  |             | 7.2 (3.8 to 13.1)  | 4.8 (-0.7 to 10.9)                    | 0.33 (0.09 to 1.19)    |         |
| PSA > 10, 12 y                            |                       | 4.0 (1.7 to 9.0)  |             | 11.2 (6.8 to 17.9) | 7.2 (0.6 to 14.3)                     | 0.35 (0.13 to 0.95)    |         |
| Risk – Low (Local)                        | 6                     | 4.1 (1.9 to 8.6)  | 4           | 2.7 (1.1 to 6.7)   | -1.4 (-6.2 to 3.2)                    | 1.50 (0.43 to 5.21)    | 0.54    |
| Risk – Low, 4 y                           |                       | 0.7 (0.1 to 3.7)  |             | 1.4 (0.4 to 4.8)   | 0.7 (-2.5 to 4.2)                     | 0.50 (0.05 to 5.45)    |         |
| Risk – Low, 8 y                           |                       | 1.4 (0.4 to 4.8)  |             | 2.0 (0.7 to 5.8)   | 0.7 (-3.0 to 4.6)                     | 0.67 (0.11 to 3.93)    |         |
| Risk – Low, 12 y                          |                       | 2.7 (1.1 to 6.7)  |             | 2.7 (1.1 to 6.7)   | 0.0 (-4.4 to 4.4)                     | 1.00 (0.25 to 3.92)    |         |
| Risk – Int (Local)                        | 8                     | 6.2 (3.2 to 11.8) | 13          | 10.8 (6.4 to 17.7) | 4.6 (-2.5 to 12.1)                    | 0.57 (0.25 to 1.33)    | 0.12    |

| CAP-Specific Mortality | Cumulative Incidence  |                    |             |                     | Absolute risk reduction<br>% (95% CI) | Relative risk (95% CI) | p-value |
|------------------------|-----------------------|--------------------|-------------|---------------------|---------------------------------------|------------------------|---------|
|                        | Radical prostatectomy |                    | Observation |                     |                                       |                        |         |
|                        | No.                   | % (95% CI)         | No.         | % (95% CI)          |                                       |                        |         |
| Risk – Int, 4 y        |                       | 2.3 (0.8 to 6.6)   |             | 1.7 (0.5 to 5.9)    | -0.7 (-5.1 to 3.8)                    | 1.40 (0.24 to 8.21)    |         |
| Risk – Int, 8 y        |                       | 3.9 (1.7 to 8.8)   |             | 5.8 (2.9 to 11.6)   | 2.0 (-3.8 to 8.1)                     | 0.66 (0.22 to 2.04)    |         |
| Risk – Int, 12 y       |                       | 4.7 (2.2 to 9.8)   |             | 9.2 (5.2 to 15.7)   | 4.5 (-2.0 to 11.5)                    | 0.51 (0.19 to 1.33)    |         |
| Risk – High (Local)    | 7                     | 9.1 (4.5 to 17.6)  | 14          | 17.5 (10.7 to 27.3) | 8.4 (-2.5 to 19.2)                    | 0.52 (0.22 to 1.22)    | 0.04    |
| Risk – High, 4 y       |                       | 2.6 (0.7 to 9.0)   |             | 2.5 (0.7 to 8.7)    | -0.1 (-6.7 to 6.4)                    | 1.04 (0.15 to 7.19)    |         |
| Risk – High, 8 y       |                       | 5.2 (2.0 to 12.6)  |             | 10.0 (5.2 to 18.5)  | 4.8 (-4.1 to 13.9)                    | 0.52 (0.16 to 1.66)    |         |
| Risk – High, 12 y      |                       | 7.8 (3.6 to 16.0)  |             | 15.0 (8.8 to 24.4)  | 7.2 (-3.1 to 17.5)                    | 0.52 (0.21 to 1.31)    |         |
| Risk – Low (Central)   | 1                     | 0.9 (0.2 to 4.9)   | 5           | 4.1 (1.8 to 9.2)    | 3.2 (-1.5 to 8.4)                     | 0.22 (0.03 to 1.85)    | 0.13    |
| Risk – Low, 4 y        |                       | 0.0 (0.0 to 3.4)   |             | 1.6 (0.5 to 5.8)    | 1.6 (-1.9 to 5.8)                     | -----                  |         |
| Risk – Low, 8 y        |                       | 0.9 (0.2 to 4.9)   |             | 3.3 (1.3 to 8.1)    | 2.4 (-2.1 to 7.3)                     | 0.27 (0.03 to 2.42)    |         |
| Risk – Low, 12 y       |                       | 0.9 (0.2 to 4.9)   |             | 4.1 (1.8 to 9.2)    | 3.2 (-1.5 to 8.4)                     | 0.22 (0.03 to 1.85)    |         |
| Risk – Int (Central)   | 11                    | 7.1 (4.0 to 12.3)  | 8           | 5.8 (2.9 to 11.0)   | -1.3 (-7.2 to 4.7)                    | 1.23 (0.51 to 2.98)    | 0.84    |
| Risk – Int, 4 y        |                       | 2.6 (1.0 to 6.5)   |             | 0.0 (0.0 to 2.7)    | -2.6 (-6.5 to 0.5)                    | -----                  |         |
| Risk – Int, 8 y        |                       | 3.2 (1.4 to 7.3)   |             | 2.2 (0.7 to 6.2)    | -1.1 (-5.4 to 3.3)                    | 1.49 (0.36 to 6.14)    |         |
| Risk – Int, 12 y       |                       | 4.5 (2.2 to 9.0)   |             | 4.3 (2.0 to 9.1)    | -0.2 (-5.3 to 5.1)                    | 1.05 (0.36 to 3.04)    |         |
| Risk – High (Central)  | 9                     | 11.5 (6.2 to 20.5) | 17          | 20.0 (12.9 to 29.7) | 8.5 (-3.0 to 19.6)                    | 0.58 (0.27 to 1.22)    | 0.05    |
| Risk – High, 4 y       |                       | 2.6 (0.7 to 8.9)   |             | 3.5 (1.2 to 9.9)    | 1.0 (-5.8 to 7.6)                     | 0.73 (0.12 to 4.23)    |         |
| Risk – High, 8 y       |                       | 6.4 (2.8 to 14.1)  |             | 11.8 (6.5 to 20.3)  | 5.4 (-4.0 to 14.7)                    | 0.54 (0.19 to 1.52)    |         |
| Risk – High, 12 y      |                       | 10.3 (5.3 to 19.0) |             | 17.7 (11.0 to 27.1) | 7.4 (-3.6 to 18.1)                    | 0.58 (0.26 to 1.30)    |         |
| Gleason (Local) < 7    | 11                    | 4.3 (2.4 to 7.6)   | 15          | 5.8 (3.5 to 9.3)    | 1.4 (-2.5 to 5.4)                     | 0.75 (0.35 to 1.61)    | 0.34    |
| Gleason < 7, 4 y       |                       | 0.8 (0.2 to 2.8)   |             | 1.5 (0.6 to 3.9)    | 0.8 (-1.5 to 3.2)                     | 0.51 (0.09 to 2.78)    |         |
| Gleason < 7, 8 y       |                       | 1.6 (0.6 to 4.0)   |             | 3.5 (1.8 to 6.4)    | 1.9 (-1.0 to 5.0)                     | 0.46 (0.14 to 1.46)    |         |
| Gleason < 7, 12 y      |                       | 2.8 (1.3 to 5.6)   |             | 5.0 (2.9 to 8.3)    | 2.2 (-1.3 to 5.9)                     | 0.55 (0.22 to 1.36)    |         |
| Gleason (Local) ≥ 7    | 10                    | 10.2 (5.6 to 17.8) | 15          | 17.4 (10.9 to 26.8) | 7.2 (-2.8 to 17.7)                    | 0.59 (0.28 to 1.23)    | 0.10    |
| Gleason ≥ 7, 4 y       |                       | 4.1 (1.6 to 10.0)  |             | 2.3 (0.6 to 8.1)    | -1.8 (-7.9 to 4.5)                    | 1.76 (0.33 to 9.35)    |         |
| Gleason ≥ 7, 8 y       |                       | 7.1 (3.5 to 14.0)  |             | 9.3 (4.8 to 17.3)   | 2.2 (-6.1 to 10.9)                    | 0.77 (0.29 to 2.03)    |         |
| Gleason ≥ 7, 12 y      |                       | 9.2 (4.9 to 16.5)  |             | 15.1 (9.1 to 24.2)  | 5.9 (-3.6 to 15.9)                    | 0.61 (0.27 to 1.35)    |         |
| Gleason (Central) < 7  | 2                     | 1.2 (0.3 to 4.2)   | 9           | 4.6 (2.4 to 8.5)    | 3.4 (-0.3 to 7.4)                     | 0.26 (0.06 to 1.18)    | 0.07    |
| Gleason < 7, 4 y       |                       | 0.0 (0.0 to 2.2)   |             | 1.0 (0.3 to 3.6)    | 1.0 (-1.3 to 3.6)                     | -----                  |         |

| CAP-Specific Mortality | Cumulative Incidence  |                    |             |                    | Absolute risk reduction<br>% (95% CI) | Relative risk (95% CI) | p-value |
|------------------------|-----------------------|--------------------|-------------|--------------------|---------------------------------------|------------------------|---------|
|                        | Radical prostatectomy |                    | Observation |                    |                                       |                        |         |
|                        | No.                   | % (95% CI)         | No.         | % (95% CI)         |                                       |                        |         |
| Gleason < 7, 8 y       |                       | 0.6 (0.1 to 3.3)   |             | 3.1 (1.4 to 6.5)   | 2.5 (-0.7 to 6.0)                     | 0.19 (0.02 to 1.60)    |         |
| Gleason < 7, 12 y      |                       | 0.6 (0.1 to 3.3)   |             | 4.1 (2.1 to 7.9)   | 3.5 (0.1 to 7.3)                      | 0.15 (0.02 to 1.15)    |         |
| Gleason (Central) ≥ 7  | 19                    | 10.9 (7.1 to 16.4) | 21          | 14.2 (9.5 to 20.7) | 3.3 (-4.0 to 10.8)                    | 0.77 (0.43 to 1.38)    | 0.11    |
| Gleason ≥ 7, 4 y       |                       | 2.3 (0.9 to 5.8)   |             | 3.4 (1.5 to 7.7)   | 1.1 (-2.9 to 5.6)                     | 0.68 (0.19 to 2.49)    |         |
| Gleason ≥ 7, 8 y       |                       | 4.0 (2.0 to 8.1)   |             | 8.1 (4.7 to 13.6)  | 4.1 (-1.2 to 10.0)                    | 0.50 (0.20 to 1.23)    |         |
| Gleason ≥ 7, 12 y      |                       | 6.3 (3.6 to 11.0)  |             | 11.5 (7.3 to 17.6) | 5.2 (-1.1 to 11.9)                    | 0.55 (0.27 to 1.14)    |         |

**\*P value:** from log-rank test for survival analysis

**Risk Status:** Low risk = PSA ≤ 10; Gleason histological score ≤ 6; tumor stage T1, T2a; Intermediate risk = PSA > 10 ≤ 20; Gleason score = 7; Stage T2b; High Risk = not low or intermediate risk but still clinically localized.

**Y = year; Perf=** Performance Status: 0= Fully Active; 1=Symptoms but ambulatory and able to do light work, 4= Completely disabled

Table S6: Bone Metastases: Cumulative Incidence

| Bone Metastasis    | Cumulative Incidence  |                   |                      |                    | Absolute risk reduction<br>% (95% CI) | Relative risk (95% CI) | p-value |
|--------------------|-----------------------|-------------------|----------------------|--------------------|---------------------------------------|------------------------|---------|
|                    | Radical prostatectomy |                   | Expectant Management |                    |                                       |                        |         |
|                    | No.                   | % (95% CI)        | No.                  | % (95% CI)         |                                       |                        |         |
| Overall            | 17                    | 4.7 (2.9 to 7.4)  | 39                   | 10.6 (7.9 to 14.2) | 6.0 (2.1 to 9.9)                      | 0.44 (0.25 to 0.76)    | 0.001   |
| All ages, 4 y      |                       | 1.4 (0.6 to 3.2)  |                      | 3.3 (1.9 to 5.6)   | 1.9 (-0.4 to 4.4)                     | 0.42 (0.15 to 1.18)    |         |
| All ages, 8 y      |                       | 1.9 (0.9 to 3.9)  |                      | 7.1 (4.9 to 10.2)  | 5.2 (2.2 to 8.4)                      | 0.27 (0.12 to 0.62)    |         |
| All ages, 12 y     |                       | 3.9 (2.3 to 6.4)  |                      | 9.5 (6.9 to 13.0)  | 5.7 (2.1 to 9.5)                      | 0.40 (0.22 to 0.74)    |         |
| Age < 65           | 7                     | 5.7 (2.8 to 11.4) | 13                   | 9.9 (5.9 to 16.2)  | 4.2 (-2.7 to 11.2)                    | 0.58 (0.24 to 1.40)    | 0.19    |
| Age < 65, 4 y      |                       | 2.5 (0.8 to 7.0)  |                      | 1.5 (0.4 to 5.4)   | -0.9 (-5.6 to 3.3)                    | 1.61 (0.27 to 9.48)    |         |
| Age < 65, 8 y      |                       | 2.5 (0.8 to 7.0)  |                      | 4.6 (2.1 to 9.6)   | 2.1 (-3.0 to 7.4)                     | 0.54 (0.14 to 2.10)    |         |
| Age < 65, 12 y     |                       | 4.9 (2.3 to 10.3) |                      | 9.2 (5.3 to 15.3)  | 4.2 (-2.4 to 11.0)                    | 0.54 (0.21 to 1.39)    |         |
| Age ≥ 65           | 10                    | 4.1 (2.3 to 7.4)  | 26                   | 11.0 (7.6 to 15.7) | 6.9 (2.2 to 11.9)                     | 0.38 (0.19 to 0.76)    | 0.002   |
| Age ≥ 65, 4 y      |                       | 0.8 (0.2 to 3.0)  |                      | 4.2 (2.3 to 7.6)   | 3.4 (0.5 to 6.9)                      | 0.20 (0.04 to 0.88)    |         |
| Age ≥ 65, 8 y      |                       | 1.7 (0.6 to 4.2)  |                      | 8.5 (5.6 to 12.7)  | 6.8 (3.0 to 11.2)                     | 0.20 (0.07 to 0.56)    |         |
| Age ≥ 65, 12 y     |                       | 3.3 (1.7 to 6.4)  |                      | 9.8 (6.6 to 14.2)  | 6.4 (2.0 to 11.2)                     | 0.34 (0.15 to 0.74)    |         |
| Race – White       | 12                    | 5.2 (3.0 to 8.8)  | 28                   | 12.7 (9.0 to 17.8) | 7.6 (2.3 to 13.1)                     | 0.41 (0.21 to 0.78)    | 0.002   |
| Race – White, 4 y  |                       | 2.2 (0.9 to 4.9)  |                      | 5.0 (2.8 to 8.7)   | 2.8 (-0.7 to 6.8)                     | 0.43 (0.15 to 1.22)    |         |
| Race – White, 8 y  |                       | 2.2 (0.9 to 4.9)  |                      | 10.0 (6.7 to 14.7) | 7.8 (3.5 to 12.7)                     | 0.22 (0.08 to 0.56)    |         |
| Race – White, 12 y |                       | 3.9 (2.1 to 7.2)  |                      | 12.7 (9.0 to 17.8) | 8.9 (3.8 to 14.2)                     | 0.30 (0.15 to 0.63)    |         |
| Race – Black       | 3                     | 2.7 (0.9 to 7.7)  | 8                    | 6.6 (3.4 to 12.5)  | 3.9 (-2.0 to 10.1)                    | 0.41 (0.11 to 1.50)    | 0.15    |
| Race – Black, 4 y  |                       | --                |                      | --                 | --                                    | --                     |         |
| Race – Black, 8 y  |                       | 1.8 (0.5 to 6.3)  |                      | 2.5 (0.9 to 7.0)   | 0.7 (-4.1 to 5.4)                     | 0.73 (0.12 to 4.27)    |         |
| Race – Black, 12 y |                       | 2.7 (0.9 to 7.7)  |                      | 4.1 (1.8 to 9.3)   | 1.4 (-4.1 to 6.9)                     | 0.65 (0.16 to 2.67)    |         |
| Race – Other       | 2                     | 9.5 (2.7 to 28.9) | 3                    | 11.5 (4.0 to 29.0) | 2.0 (-18.8 to 20.8)                   | 0.83 (0.15 to 4.49)    | 0.83    |
| Race – Other, 4 y  |                       | 0.0 (0.0 to 15.5) |                      | 3.9 (0.7 to 18.9)  | 3.9 (-11.9 to 18.9)                   | --                     |         |
| Race – Other, 8 y  |                       | 0.0 (0.0 to 15.5) |                      | 3.9 (0.7 to 18.9)  | 3.9 (-11.9 to 18.9)                   | --                     |         |
| Race – Other, 12 y |                       | 9.5 (2.7 to 28.9) |                      | 7.7 (2.1 to 24.1)  | -1.8 (-22.0 to 16.0)                  | 1.24 (0.19 to 8.06)    |         |
| PSA ≤ 10           | 12                    | 5.0 (2.9 to 8.6)  | 21                   | 8.7 (5.8 to 13.0)  | 3.7 (-1.0 to 8.4)                     | 0.58 (0.29 to 1.15)    | 0.09    |
| PSA ≤ 10, 4 y      |                       | 1.7 (0.7 to 4.2)  |                      | 2.9 (1.4 to 5.9)   | 1.2 (-1.7 to 4.4)                     | 0.58 (0.17 to 1.95)    |         |
| PSA ≤ 10, 8 y      |                       | 2.5 (1.2 to 5.4)  |                      | 5.4 (3.2 to 9.0)   | 2.9 (-0.8 to 6.7)                     | 0.47 (0.18 to 1.21)    |         |
| PSA ≤ 10, 12 y     |                       | 4.2 (2.3 to 7.6)  |                      | 7.9 (5.1 to 12.0)  | 3.7 (-0.7 to 8.2)                     | 0.53 (0.25 to 1.12)    |         |



| Bone Metastasis       | Cumulative Incidence  |                   |                      |                     | Absolute risk reduction<br>% (95% CI) | Relative risk (95% CI) | p-value |
|-----------------------|-----------------------|-------------------|----------------------|---------------------|---------------------------------------|------------------------|---------|
|                       | Radical prostatectomy |                   | Expectant Management |                     |                                       |                        |         |
|                       | No.                   | % (95% CI)        | No.                  | % (95% CI)          |                                       |                        |         |
| PSA > 10              | 5                     | 4.0 (1.7 to 9.0)  | 18                   | 14.4 (9.3 to 21.6)  | 10.4 (3.3 to 18.0)                    | 0.28 (0.11 to 0.72)    | 0.001   |
| PSA > 10, 4 y         |                       | 0.8 (0.1 to 4.4)  |                      | 4.0 (1.7 to 9.0)    | 3.2 (-1.0 to 8.3)                     | 0.20 (0.02 to 1.67)    |         |
| PSA > 10, 8 y         |                       | 0.8 (0.1 to 4.4)  |                      | 10.4 (6.2 to 17.0)  | 9.6 (4.1 to 16.2)                     | 0.08 (0.01 to 0.57)    |         |
| PSA > 10, 12 y        |                       | 3.2 (1.2 to 7.9)  |                      | 12.8 (8.0 to 19.8)  | 9.6 (2.9 to 16.9)                     | 0.25 (0.09 to 0.72)    |         |
| Risk – Low (Local)    | 6                     | 4.1 (1.9 to 8.6)  | 9                    | 6.1 (3.2 to 11.2)   | 2.0 (-3.3 to 7.6)                     | 0.67 (0.24 to 1.83)    | 0.39    |
| Risk – Low, 4 y       |                       | 0.7 (0.1 to 3.7)  |                      | 2.7 (1.1 to 6.7)    | 2.0 (-1.4 to 6.1)                     | 0.25 (0.03 to 2.21)    |         |
| Risk – Low, 8 y       |                       | 1.4 (0.4 to 4.8)  |                      | 4.1 (1.9 to 8.6)    | 2.7 (-1.4 to 7.3)                     | 0.33 (0.07 to 1.62)    |         |
| Risk – Low, 12 y      |                       | 2.7 (1.1 to 6.7)  |                      | 6.1 (3.2 to 11.2)   | 3.4 (-1.6 to 8.7)                     | 0.44 (0.14 to 1.41)    |         |
| Risk – Int (Local)    | 6                     | 4.7 (2.2 to 9.8)  | 19                   | 15.8 (10.4 to 23.4) | 11.2 (3.7 to 19.2)                    | 0.29 (0.12 to 0.71)    | 0.002   |
| Risk – Int, 4 y       |                       | 1.6 (0.4 to 5.5)  |                      | 3.3 (1.3 to 8.3)    | 1.8 (-2.6 to 6.8)                     | 0.47 (0.09 to 2.49)    |         |
| Risk – Int, 8 y       |                       | 2.3 (0.8 to 6.6)  |                      | 8.3 (4.6 to 14.7)   | 6.0 (0.3 to 12.5)                     | 0.28 (0.08 to 0.99)    |         |
| Risk – Int, 12 y      |                       | 4.7 (2.2 to 9.8)  |                      | 12.5 (7.7 to 19.6)  | 7.9 (0.8 to 15.4)                     | 0.37 (0.15 to 0.93)    |         |
| Risk – High (Local)   | 4                     | 5.2 (2.0 to 12.6) | 11                   | 13.8 (7.9 to 23.0)  | 8.6 (-0.9 to 18.3)                    | 0.38 (0.13 to 1.14)    | 0.03    |
| Risk – High, 4 y      |                       | 1.3 (0.2 to 7.0)  |                      | 5.0 (2.0 to 12.2)   | 3.7 (-2.8 to 10.9)                    | 0.26 (0.03 to 2.27)    |         |
| Risk – High, 8 y      |                       | 1.3 (0.2 to 7.0)  |                      | 12.5 (6.9 to 21.5)  | 11.2 (3.2 to 20.2)                    | 0.10 (0.01 to 0.79)    |         |
| Risk – High, 12 y     |                       | 3.9 (1.3 to 10.8) |                      | 13.8 (7.9 to 23.0)  | 9.9 (0.8 to 19.4)                     | 0.28 (0.08 to 0.98)    |         |
| Risk – Low (Central)  | 1                     | 0.9 (0.2 to 4.9)  | 6                    | 4.9 (2.3 to 10.3)   | 4.0 (-0.8 to 9.5)                     | 0.18 (0.02 to 1.50)    | 0.08    |
| Risk – Low, 4 y       |                       | 0.0 (0.0 to 3.4)  |                      | 2.5 (0.8 to 7.0)    | 2.5 (-1.3 to 7.0)                     | --                     |         |
| Risk – Low, 8 y       |                       | 0.0 (0.0 to 3.4)  |                      | 4.1 (1.8 to 9.2)    | 4.1 (0.0 to 9.2)                      | --                     |         |
| Risk – Low, 12 y      |                       | 0.0 (0.0 to 3.4)  |                      | 4.9 (2.3 to 10.3)   | 4.9 (0.7 to 10.3)                     | --                     |         |
| Risk – Int (Central)  | 10                    | 6.5 (3.5 to 11.5) | 16                   | 11.5 (7.2 to 17.9)  | 5.1 (-1.6 to 12.1)                    | 0.56 (0.26 to 1.19)    | 0.08    |
| Risk – Int, 4 y       |                       | 1.9 (0.7 to 5.5)  |                      | 1.4 (0.4 to 5.1)    | -0.5 (-4.2 to 3.4)                    | 1.35 (0.23 to 7.93)    |         |
| Risk – Int, 8 y       |                       | 3.2 (1.4 to 7.3)  |                      | 5.0 (2.5 to 10.0)   | 1.8 (-3.0 to 7.1)                     | 0.64 (0.21 to 1.97)    |         |
| Risk – Int, 12 y      |                       | 5.8 (3.1 to 10.7) |                      | 8.6 (5.0 to 14.5)   | 2.8 (-3.2 to 9.3)                     | 0.67 (0.29 to 1.55)    |         |
| Risk – High (Central) | 5                     | 6.4 (2.8 to 14.1) | 15                   | 17.7 (11.0 to 27.1) | 11.2 (1.0 to 21.4)                    | 0.36 (0.14 to 0.95)    | 0.01    |
| Risk – High, 4 y      |                       | 2.6 (0.7 to 8.9)  |                      | 7.1 (3.3 to 14.6)   | 4.5 (-2.9 to 12.2)                    | 0.36 (0.08 to 1.75)    |         |
| Risk – High, 8 y      |                       | 2.6 (0.7 to 8.9)  |                      | 14.1 (8.3 to 23.1)  | 11.6 (3.0 to 20.7)                    | 0.18 (0.04 to 0.79)    |         |
| Risk – High, 12 y     |                       | 5.1 (2.0 to 12.5) |                      | 17.7 (11.0 to 27.1) | 12.5 (2.6 to 22.5)                    | 0.29 (0.10 to 0.84)    |         |
| Charlson Score = 0    | 14                    | 6.3 (3.8 to 10.2) | 27                   | 12.3 (8.6 to 17.3)  | 6.0 (0.6 to 11.6)                     | 0.51 (0.27 to 0.94)    | 0.02    |

| Bone Metastasis         | Cumulative Incidence  |                   |                      |                     | Absolute risk reduction<br>% (95% CI) | Relative risk (95% CI) | p-value |
|-------------------------|-----------------------|-------------------|----------------------|---------------------|---------------------------------------|------------------------|---------|
|                         | Radical prostatectomy |                   | Expectant Management |                     |                                       |                        |         |
|                         | No.                   | % (95% CI)        | No.                  | % (95% CI)          |                                       |                        |         |
| Charlson = 0, 4 y       |                       | 1.3 (0.5 to 3.9)  |                      | 2.7 (1.3 to 5.8)    | 1.4 (-1.5 to 4.6)                     | 0.49 (0.12 to 1.94)    |         |
| Charlson = 0, 8 y       |                       | 2.2 (1.0 to 5.1)  |                      | 7.7 (4.9 to 12.0)   | 5.5 (1.4 to 10.0)                     | 0.29 (0.11 to 0.77)    |         |
| Charlson = 0, 12 y      |                       | 4.9 (2.8 to 8.6)  |                      | 10.9 (7.4 to 15.7)  | 6.0 (1.0 to 11.3)                     | 0.45 (0.23 to 0.90)    |         |
| Charlson Score ≥ 1      | 3                     | 2.1 (0.7 to 6.1)  | 12                   | 8.2 (4.7 to 13.7)   | 6.0 (0.8 to 11.8)                     | 0.26 (0.08 to 0.91)    | 0.02    |
| Charlson ≥ 1, 4 y       |                       | 1.4 (0.4 to 5.1)  |                      | 4.1 (1.9 to 8.6)    | 2.7 (-1.6 to 7.3)                     | 0.35 (0.07 to 1.71)    |         |
| Charlson ≥ 1, 8 y       |                       | 1.4 (0.4 to 5.1)  |                      | 6.1 (3.3 to 11.2)   | 4.7 (0.1 to 9.9)                      | 0.23 (0.05 to 1.06)    |         |
| Charlson ≥ 1, 12 y      |                       | 2.1 (0.7 to 6.1)  |                      | 7.5 (4.2 to 12.9)   | 5.3 (0.2 to 10.9)                     | 0.29 (0.08 to 1.01)    |         |
| Perf Status = 0         | 15                    | 4.8 (2.9 to 7.8)  | 32                   | 10.3 (7.4 to 14.2)  | 5.5 (1.4 to 9.8)                      | 0.47 (0.26 to 0.84)    | 0.005   |
| Perf Status = 0, 4 y    |                       | 1.6 (0.7 to 3.7)  |                      | 2.9 (1.5 to 5.4)    | 1.3 (-1.2 to 4.0)                     | 0.55 (0.19 to 1.63)    |         |
| Perf Status = 0, 8 y    |                       | 2.2 (1.1 to 4.6)  |                      | 6.5 (4.2 to 9.8)    | 4.2 (1.0 to 7.7)                      | 0.35 (0.15 to 0.81)    |         |
| Perf Status = 0, 12 y   |                       | 4.2 (2.5 to 7.0)  |                      | 9.0 (6.3 to 12.7)   | 4.9 (1.0 to 9.0)                      | 0.46 (0.24 to 0.87)    |         |
| Perf Status = 1 – 4     | 2                     | 3.9 (1.1 to 13.0) | 7                    | 12.3 (6.1 to 23.3)  | 8.4 (-2.6 to 19.8)                    | 0.31 (0.07 to 1.44)    | 0.07    |
| Perf Status = 1-4, 4 y  |                       | 0.0 (0.0 to 6.9)  |                      | 5.3 (1.8 to 14.4)   | 5.3 (-2.4 to 14.4)                    | --                     |         |
| Perf Status = 1-4, 8 y  |                       | 0.0 (0.0 to 6.9)  |                      | 10.5 (4.9 to 21.1)  | 10.5 (1.7 to 21.1)                    | --                     |         |
| Perf Status = 1-4, 12 y |                       | 1.9 (0.3 to 10.1) |                      | 12.3 (6.1 to 23.3)  | 10.4 (0.1 to 21.4)                    | 0.16 (0.02 to 1.23)    |         |
| Gleason (Local) < 7     | 9                     | 3.5 (1.9 to 6.6)  | 21                   | 8.1 (5.3 to 12.0)   | 4.5 (0.4 to 8.9)                      | 0.44 (0.21 to 0.94)    | 0.02    |
| Gleason < 7, 4 y        |                       | 0.4 (0.1 to 2.2)  |                      | 2.7 (1.3 to 5.4)    | 2.3 (0.0 to 5.1)                      | 0.15 (0.02 to 1.18)    |         |
| Gleason < 7, 8 y        |                       | 1.2 (0.4 to 3.4)  |                      | 5.4 (3.2 to 8.8)    | 4.2 (1.1 to 7.7)                      | 0.22 (0.06 to 0.76)    |         |
| Gleason < 7, 12 y       |                       | 2.4 (1.1 to 5.1)  |                      | 7.7 (5.0 to 11.5)   | 5.3 (1.5 to 9.4)                      | 0.31 (0.13 to 0.76)    |         |
| Gleason (Local) ≥ 7     | 7                     | 7.1 (3.5 to 14.0) | 18                   | 20.9 (13.7 to 30.7) | 13.8 (3.8 to 24.2)                    | 0.34 (0.15 to 0.78)    | 0.003   |
| Gleason ≥ 7, 4 y        |                       | 3.1 (1.1 to 8.6)  |                      | 5.8 (2.5 to 12.9)   | 2.8 (-3.7 to 10.1)                    | 0.53 (0.13 to 2.14)    |         |
| Gleason ≥ 7, 8 y        |                       | 3.1 (1.1 to 8.6)  |                      | 14.0 (8.2 to 22.8)  | 10.9 (2.9 to 20.0)                    | 0.22 (0.06 to 0.75)    |         |
| Gleason ≥ 7, 12 y       |                       | 7.1 (3.5 to 14.0) |                      | 17.4 (10.9 to 26.8) | 10.3 (0.8 to 20.3)                    | 0.41 (0.18 to 0.96)    |         |
| Gleason (Central) < 7   | 2                     | 1.2 (0.3 to 4.2)  | 8                    | 4.1 (2.1 to 7.9)    | 2.9 (-0.8 to 6.8)                     | 0.29 (0.06 to 1.35)    | 0.10    |
| Gleason < 7, 4 y        |                       | 0.0 (0.0 to 2.2)  |                      | 1.5 (0.5 to 4.4)    | 1.5 (-0.9 to 4.4)                     | --                     |         |
| Gleason < 7, 8 y        |                       | 0.0 (0.0 to 2.2)  |                      | 2.6 (1.1 to 5.8)    | 2.6 (-0.1 to 5.8)                     | --                     |         |
| Gleason < 7, 12 y       |                       | 0.6 (0.1 to 3.3)  |                      | 3.6 (1.7 to 7.2)    | 3.0 (-0.3 to 6.6)                     | 0.17 (0.02 to 1.34)    |         |
| Gleason (Central) ≥ 7   | 14                    | 8.1 (4.9 to 13.1) | 29                   | 19.6 (14.0 to 26.7) | 11.6 (4.0 to 19.4)                    | 0.41 (0.23 to 0.75)    | 0.0001  |
| Gleason ≥ 7, 4 y        |                       | 2.9 (1.2 to 6.6)  |                      | 5.4 (2.8 to 10.3)   | 2.5 (-2.0 to 7.7)                     | 0.53 (0.18 to 1.59)    |         |

|                        | Cumulative Incidence  |                   |                      |                     | Absolute risk reduction<br>% (95% CI) | Relative risk (95% CI) | p-value |
|------------------------|-----------------------|-------------------|----------------------|---------------------|---------------------------------------|------------------------|---------|
|                        | Radical prostatectomy |                   | Expectant Management |                     |                                       |                        |         |
|                        | No.                   | % (95% CI)        | No.                  | % (95% CI)          |                                       |                        |         |
| Bone Metastasis        |                       |                   |                      |                     |                                       |                        |         |
| Gleason $\geq$ 7, 8 y  |                       | 4.0 (2.0 to 8.1)  |                      | 12.8 (8.4 to 19.2)  | 8.8 (2.8 to 15.5)                     | 0.31 (0.14 to 0.72)    |         |
| Gleason $\geq$ 7, 12 y |                       | 6.9 (4.0 to 11.7) |                      | 17.6 (12.3 to 24.5) | 10.7 (3.6 to 18.2)                    | 0.39 (0.21 to 0.75)    |         |

**\*P value:** from log-rank test for survival analysis

**Risk Status:** Low risk = PSA  $\leq$  10; Gleason histological score  $\leq$  6; tumor stage T1, T2a; Intermediate risk = PSA  $>$  10  $\leq$  20; Gleason score = 7; Stage T2b; High Risk = not low or intermediate risk but still clinically localized.

**Y** = year; **Perf**= Performance Status: 0= Fully Active; 1=Symptoms but ambulatory and able to do light work, 4= Completely disabled

Figure S1

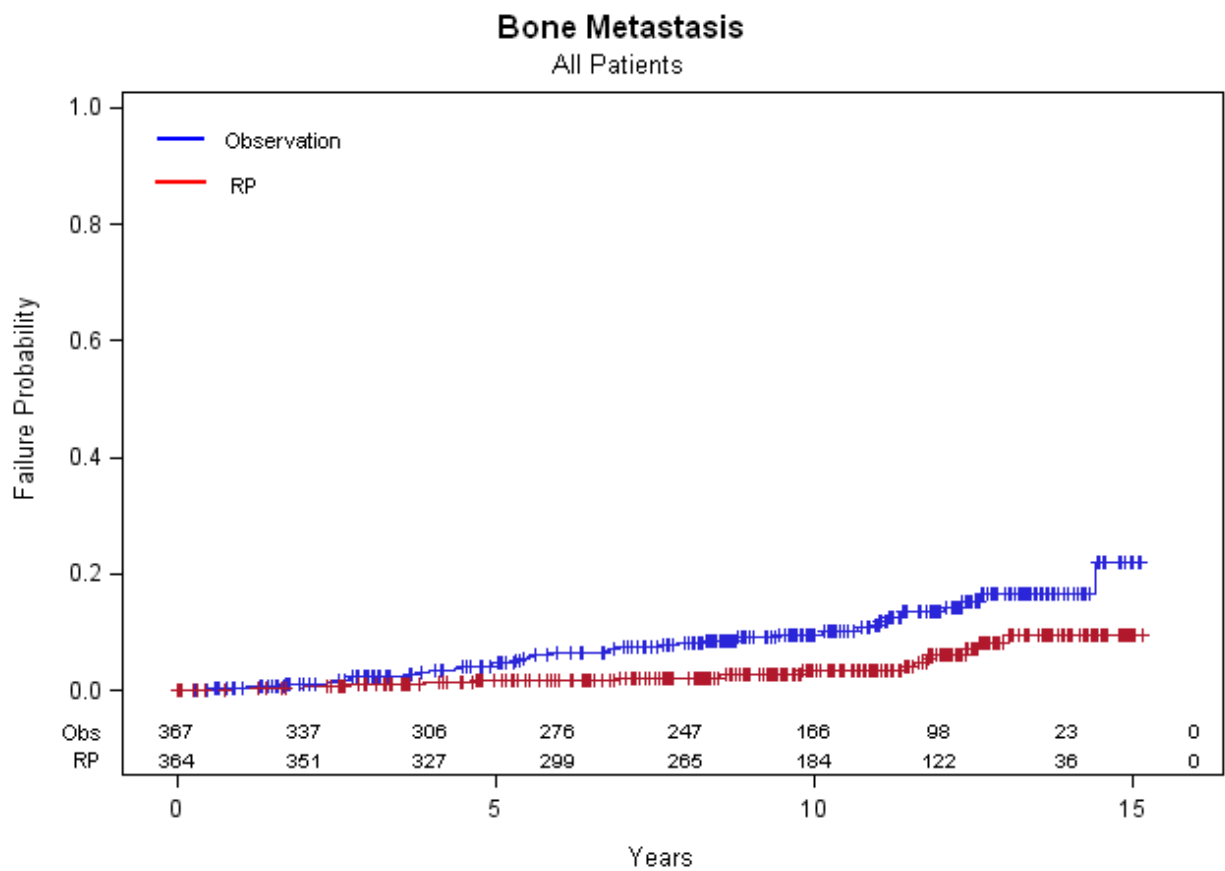

Figure S2a: All cause mortality: PSA <= 10 ng/mL

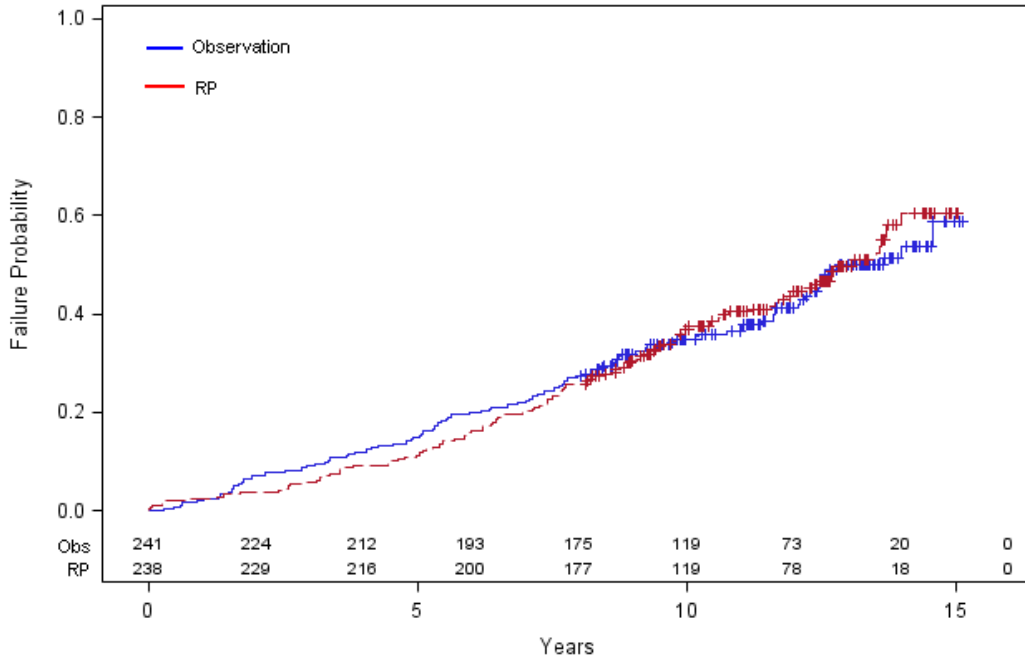

Figure S2b: All cause mortality: PSA > 10 ng/mL

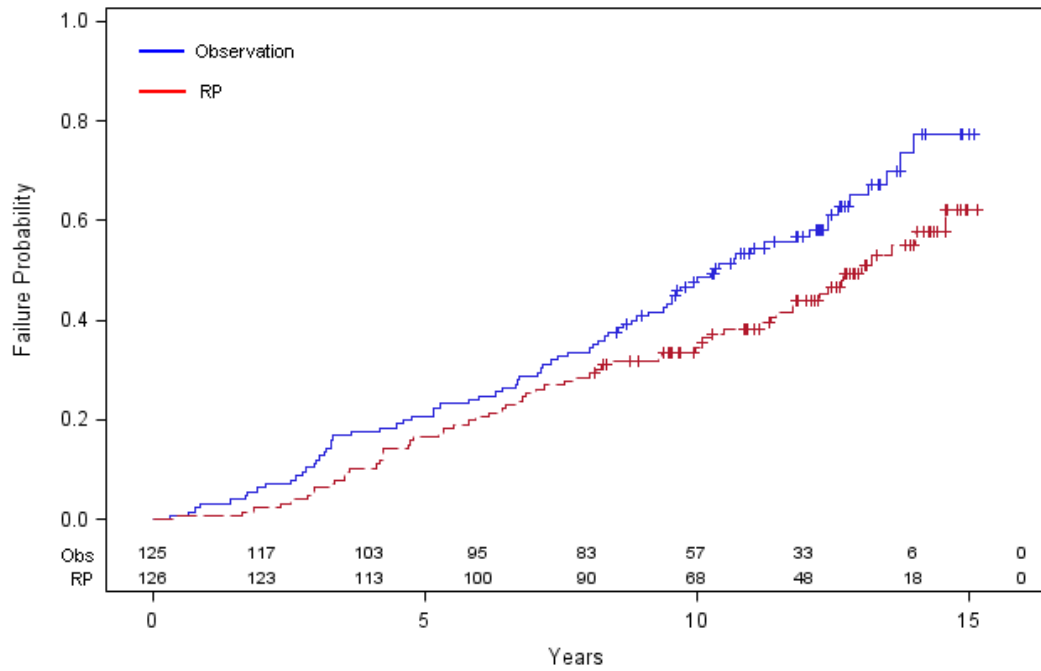

Figure S2c-e. All-cause Mortality By Risk Category: c: Low Risk; d: Intermediate Risk; e: High Risk

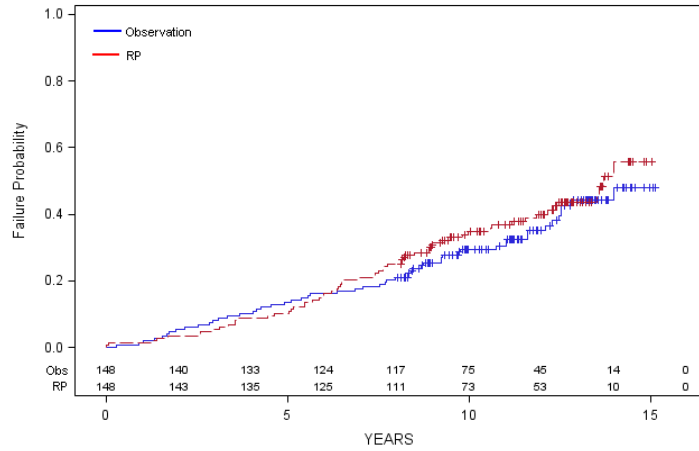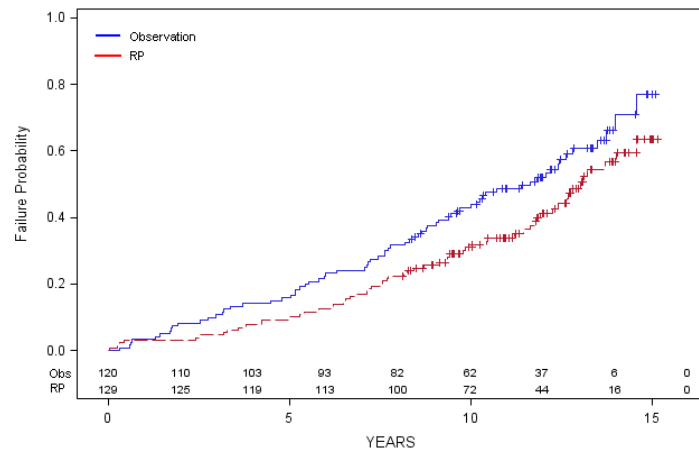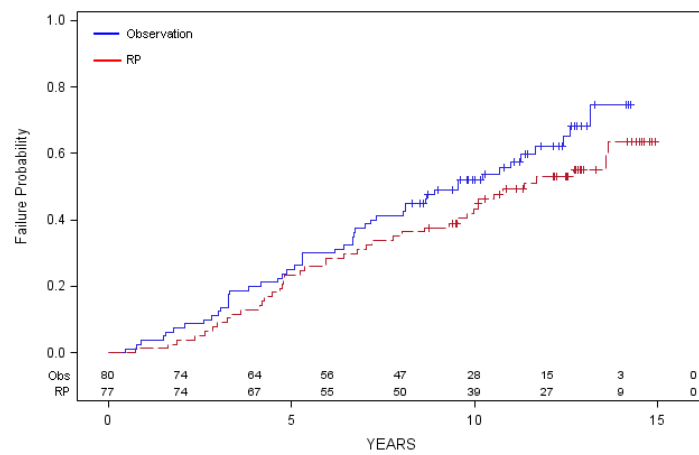

Figure S3a: Prostate cancer mortality: PSA  $\leq$  10 ng/mL

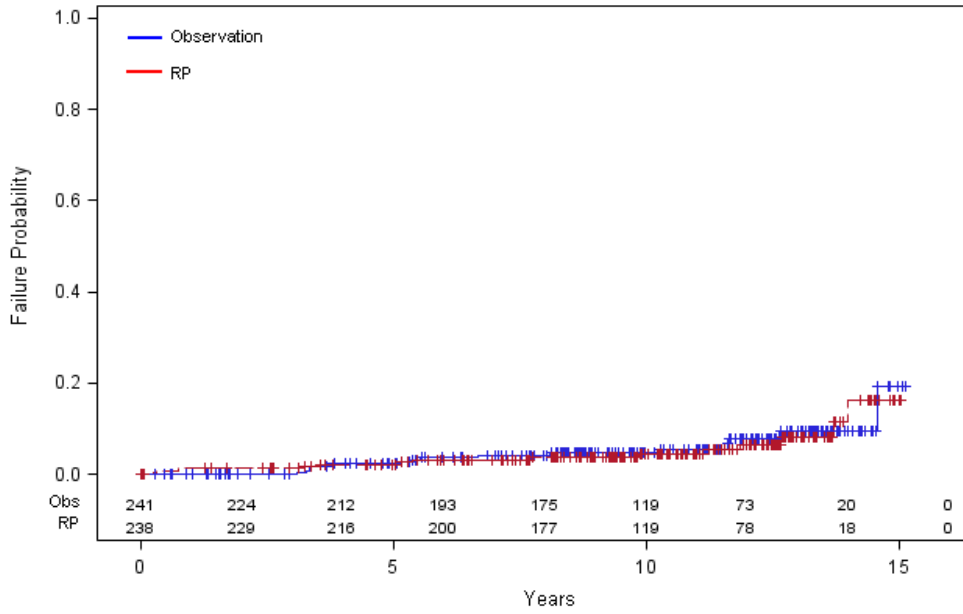

Figure S3b: Prostate cancer mortality: PSA >10 ng/mL

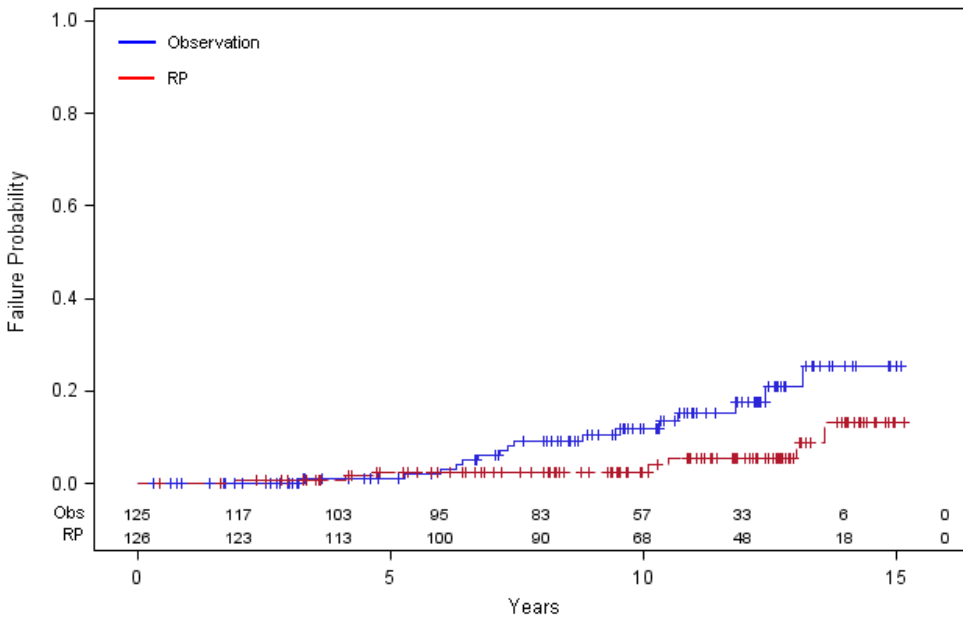

Figure S3c-e: Prostate Cancer Mortality By Risk Category: c: Low Risk; d: Intermediate Risk; e = High Risk

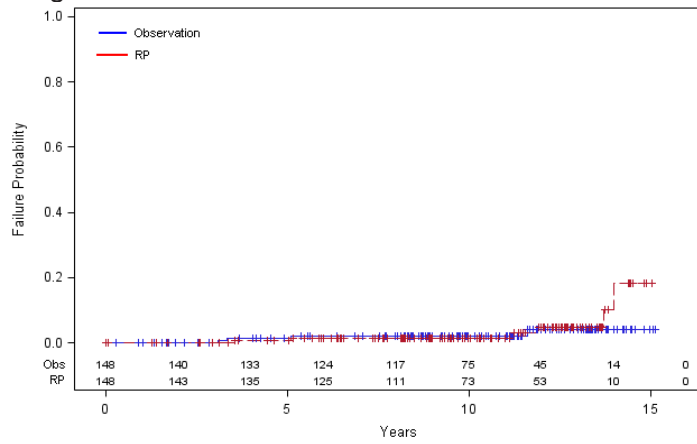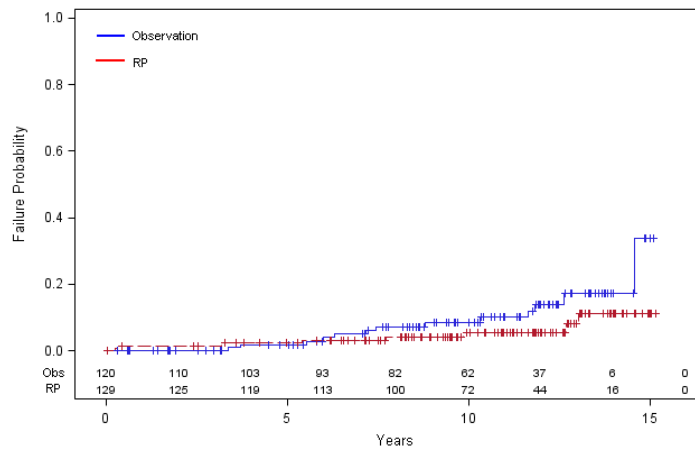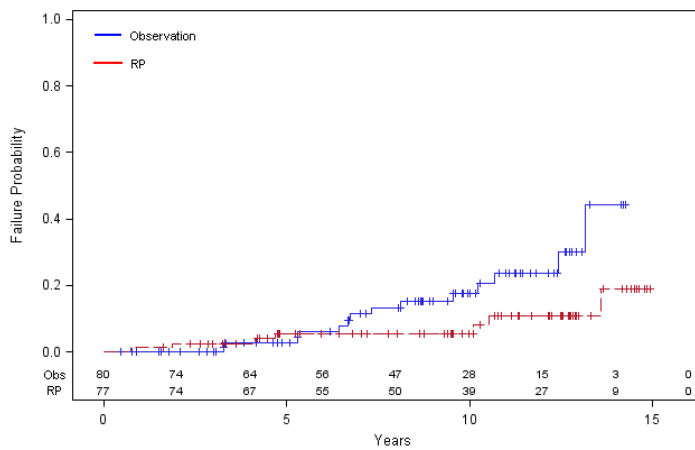



## Legends:

Figure 1: Screening, Randomization, and Follow-up. \*: EBRT=External Beam Radiation Therapy

Figure 2a: Cumulative incidence of death in the two study groups overall: Hazard Ratio = 0.88; (95%CI= 0.71 to 1.08); p = 0.22; absolute risk reduction = 2.9%; (95%CI= -4.1 to 10.3)

Figure 2b: Cumulative incidence of prostate cancer death in the two groups overall: Hazard Ratio = 0.63; (95%CI= 0.36 to 1.09); p = 0.09; Absolute risk reduction = 2.7%; (95%CI= -1.3 to 6.2).

Figure 3a-b: Subgroup analysis for the Primary (all-cause mortality) (Panel A) and Secondary outcome (prostate cancer mortality) (Panel B). The size of the squares are proportional to the size of the subgroups. Horizontal bars represent 95% confidence intervals.

Appendix Figure 1: Bone Metastases: Cumulative incidence of bone metastases in the two study groups. Hazard ratio = 0.39; (95%CI=0.22 to 0.70); p = 0.0009; Absolute risk reduction = 6.0% (95%CI=2.1 to 9.9).

Appendix Figure 2a-e: Cumulative incidence of all-cause mortality in the two study groups according to tumor subgroups: Panel A: PSA  $\leq$  10; Panel B: PSA > 10; Panel C: Low D'Amico Tumor Risk Category; Panel D: Intermediate D'Amico Tumor Risk Category; Panel E: High D'Amico Tumor Risk Category.

Appendix Figure 3a-e: Cumulative incidence of prostate cancer mortality in the two study groups according to tumor subgroups: Panel A: PSA  $\leq$  10; Panel B: PSA > 10; Panel C: Low D'Amico Tumor Risk Category; Panel D: Intermediate D'Amico Tumor Risk Category; Panel E: High D'Amico Tumor Risk Category.

## REFERENCES

1. Cooperberg MR, Broering JM, Carroll PR. Time trends and local variation in primary treatment of localized prostate cancer. *J Clin Oncol.* 2010;28:1117-1123.
2. Wilt TJ, MacDonald R, Rutks I, Shamliyan TA, Taylor BC, Kane RL. Systematic review: comparative effectiveness and harms of treatments for clinically localized prostate cancer. *Ann Intern Med* 2008;148:435–48.
3. <http://consensus.nih.gov/2011/docs/prostate/ASPC%20Final%20Draft%20Statement.pdf> (accessed January 26, 2012)
4. Iversen P, Madsen PO, Corle DK. Radical prostatectomy versus expectant treatment for early carcinoma of the prostate. Twenty-three year follow-up of a prospective randomized study. *Scan J Urol Nephrol Suppl* 1995;172:65–72.
5. Bill-Axelson A, Holmberg L, Ruutu M, et al. Radical prostatectomy versus watchful waiting in localized prostate cancer: The Scandinavian Prostate Cancer Group-4 randomized trial. *N Engl J Med.* 2011;264:1708-17.
6. Widmark A. Prospective Randomized Trial Comparing External Beam Radiotherapy versus Watchful Waiting in Early Prostate Cancer. Abstract. Annual Meeting of the American Society of Radiation Oncology. 2011
7. Lu-Yao, GL, Albertsen PC, Moore DF, Shih W, Lin Y, DiPaola RS et al. *JAMA.* 2009;302(11)1202-1209.
8. Graham J, Baker M, Macbeth F, Titshall V. on behalf of the Guideline Development Group. Diagnosis and treatment of prostate cancer: summary of NICE guidance. *BMJ.* 2008; 336:610–612.
9. Wilt TJ, Brawer MK, Barry MJ, Jones KM, Kwon Y, Gingrich JR, Aronson WJ, Nsouli I, Iyer P, Cartagena R, Snider G, Roehrborn C, Fox S. The Prostate cancer Intervention Versus Observation Trial: VA/NCI/AHRQ Cooperative Studies Program 407 (PIVOT): Design and Baseline Results of a Randomized Controlled Trial Comparing Radical Prostatectomy to Watchful Waiting for Men with Clinically Localized Prostate Cancer. *Contemporary Clinical Trials.*2009;30:81-87.
10. Allison, Paul D., *Survival Analysis Using the SAS® System: A Practical Guide*, Cary, NC: SAS Institute Inc.,1995.292 pp.
11. Charlson ME, Pompei P, Ales K, MacKenzie CR. A new method of classifying prognostic comorbidity in longitudinal studies: development and validation. *J Chron Dis* 1987;40:373–83.
12. D'Amico AV, Whittington R, Malkowicz SB et al. Biochemical outcome after radical prostatectomy, external beam radiation therapy, or interstitial radiation therapy for clinically localized prostate cancer. *JAMA* 1998;280:969-74.
13. Welch HG and Albertsen P. Prostate Cancer Diagnosis and Treatment After the Introduction of Prostate-Specific. Antigen Testing. *J. Natl. Cancer Inst..*2009; 101:1325-1329.
14. Thompson IM and Klotz L. Active Surveillance for Prostate Cancer. *JAMA.*2010;204:2411-2412. Hayes JH, Ollendorf DA, Pearson SD et al. Active surveillance compared with initial treatment for men with low-risk prostate cancer: a decision analysis. *JAMA* 2010;301:2373-2380.t 2):S14-S19.

15. Cooperberg MR, Broering JM, Kantoff PW, Carroll PR. Contemporary trends in low risk prostate cancer: risk assessment and treatment. *J Urol.* 2007;178 (3 pt 2):S14-S19.
16. Fleming C, Wasson JH, Albertsen PC, Barry MJ, Wennberg JE. Prostate Patient Outcomes Research Team. A decision analysis of alternative treatment strategies for clinically localized prostate cancer. *JAMA.* 1993;269 (20)2650-2658.
17. Djulbegovic M, Beyth RJ, Neuberger MM, Stoffs TL, Vieweg J, Djulbegovic B, Dahm P. Screening for prostate cancer: systematic review and metaanalysis of randomised controlled trials *BMJ* 2010;341:c4543
18. Andriole G, Grubb R, Buys S, Chia D, Church T, Fouad M, et al. Mortality results from a randomized prostate cancer screening trial. *New England Journal of Medicine* 2009;360:1310-9.20.
19. Schroder F, Hugosson J, Roobol M, Tammela T, Ciatto S, Nelen V, et al. Screening and prostate-cancer mortality in a randomized European study. *New England Journal of Medicine* 2009;360:1320-8.
20. Coen JJ, Feldman AS, Smith MR, Zietman AL. Watchful waiting for localized prostate cancer in the PSA era: what have been the triggers for intervention? 2011;107:1582-1586.22.
21. Dubben H-H. Trials of prostate cancer screening are not worthwhile. *Lancet Oncol* 2009;10:294-9823.
22. Schellhammer P, Cockett A, Boccon-Gibod L, et al. Assessment of endpoints for clinical trials for localized prostate cancer. *Urology* 1997;49:27-38.
23. Newschaffer CJ, Otani K, McDonald MK, Penberthy LT. Causes of death in elderly prostate cancer patients and in a comparison nonprostate cancer cohort. *J Natl Cancer Inst* 2000;92:613-21.
24. Bill-Axelson A, Holmberg L, Filen F, et al. Radical prostatectomy versus Watchful waiting in localized prostate cancer: The Scandinavian Prostate Cancer Group-4 randomized trial. *J Natl Cancer Inst* 2008;100:1144–54.
25. Shao Y-H, Demissie K, Shih W, et al. Contemporary Risk Profile of Prostate Cancer in the United States. *J Natl Cancer Inst* 2009;101:1280-1283.
26. Wilt TJ, Shamliyan T, Taylor B, MacDonald R, Tacklind J, Rutks I, Koeneman K, Cho C-S, Kane RL. Comparative Effectiveness of Therapies for Clinically Localized Prostate Cancer. Comparative Effectiveness Review No. 13. (Prepared by Minnesota Evidence-based Practice Center under Contract No. 290-02-00009.) Rockville, MD: Agency for Healthcare Research and Quality. February 2008.
27. Eastham JA, Kattan MW, Riedel E, Begg CB, Wheeler TM, Gerigk C, Gonen M, Reuter V and Scardino PT. Variations among individual surgeons in the rate of positive surgical margins in radical prostatectomy specimens. [The Journal of Urology](#). 2003;170:2292-2295.
28. C. Obek, S. Sadek, S. Lai, F. Civantos, D. Rubinowicz and M.S. Soloway, Positive surgical margins with radical retropubic prostatectomy: anatomic site-specific pathologic analysis and impact on prognosis, *Urology*1999;54:682-688.
29. Swindle P, Eastham JA, Ohori M, et al.. Do margins matter? The prognostic significance of positive surgical margins in radical prostatectomy specimens. *J Urol.* 2005;174:903–907.

30. Vis AN, Schröder FH, van der Kwast TH. The actual value of the surgical margin status as a predictor of disease progression in men with early prostate cancer. *Eur Urol.* 2006;50:258–265.
31. Ohori M, Wheeler TM, Kattan MW, Goto Y, Scardino PT. Prognostic significance of positive surgical margins in radical prostatectomy specimens. *J Urol.* 1995;154:1818–1824.
32. Albertsen PC, Hanley JA, Barrows GH, et al. Prostate Cancer and the Will Rogers Phenomenon. *J Natl Cancer Inst.* 2005;97:1248-53.
33. Ghani KR, Grigor K, Tulloch DN, Bollina PR, McNeill SA. Trends in Reporting Gleason Score 1991 to 2001: Changes in the Pathologist's Practice. *European Urology.* 2005;47:196-201.
34. Stamey TA, Johnstone IM, McNeal JE, Lu AY and Yemoto CM. Preoperative serum Prostate Specific Antigen Levels between 2 and 22 ng/mL correlate poorly with post-radical prostatectomy cancer morphology: Prostate Specific Antigen Cure rates appear constant between 2 and 9 ng/mL. *Journal of Urology.* 2002; 167:103-111.
35. Donovan JL, Mills N, Smith, Brindle L, Jacoby A, Peters T, et al. Improving design and conduct of randomized trials by embedding them in qualitative research: ProtecT (prostate testing for cancer and treatment) study. *BMJ* 2002;325:766-70.
36. Rosario DJ, Lane JA, Metcalfe C, Donovan JL, Doble A, et al. Short term outcomes of prostate biopsy in men tested for cancer by prostate specific antigen: prospective evaluation within ProtecT study. *BMJ.* 2012;344:d7894

## PIVOT STUDY GROUP

| <b>PIVOT Chairman's Office</b>                                           |                          |
|--------------------------------------------------------------------------|--------------------------|
| Principal Investigator                                                   | Timothy J. Wilt, MD, MPH |
| Co-Investigator                                                          | Michael Brawer, MD       |
| National Study Coordinator                                               | Maureen Carlyle, MPH     |
|                                                                          | Debra McKeehen, MS       |
|                                                                          | Marilyn Christiansen, MA |
| <b>Cooperative Studies Program Coordinating Center</b>                   |                          |
| Director                                                                 | Joseph Collins, ScD      |
| Assistant Director                                                       | David Weiss, PhD         |
| Assistant Chief of Administration                                        | Susan Stinnett           |
| Biostatistician                                                          | Karen Jones, MS          |
| Project Manager                                                          | Annette Wiseman          |
| Programmer                                                               | Christine Dalzell        |
|                                                                          | Diana Smith              |
|                                                                          | Philip Connor, BS        |
| Computer Assistant                                                       | Daniel Briones           |
|                                                                          | Beverly Calvert          |
|                                                                          | Patricia Grubb           |
| <b>Central Laboratory</b>                                                |                          |
| Director                                                                 | Jamie Barnhill, PhD†     |
| Research Lab Assistant                                                   | Dianne Peterson          |
|                                                                          | Thelma Salazar           |
| <b>Central Histopathology Reading Center</b>                             |                          |
| Central Histopathologist                                                 | Thomas Wheeler, MD       |
| Coordinator                                                              | Lashaune DeJean          |
| <b>PIVOT Endpoints Adjudication Committee</b>                            |                          |
| Michael Barry, MD                                                        |                          |
| Daniel Culkin, MD                                                        |                          |
| Gerald Andriole, MD                                                      |                          |
| <b>PIVOT Executive Committee (*members at close of study, †deceased)</b> |                          |
| William Aronson, MD*                                                     |                          |
| Jamie Barnhill, PhD*†                                                    |                          |
| Michael Barry, MD*                                                       |                          |
| Elie Benaim, MD*                                                         |                          |
| Arthur Crowley, MD*                                                      |                          |
| Daniel Culkin, MD*                                                       |                          |
| Steven Fox, MD*                                                          |                          |
| Karen Jones, MS*                                                         |                          |
| Timothy Moon, MD*                                                        |                          |
| John Wei, MD*                                                            |                          |
| Thomas Wheeler, MD*                                                      |                          |
| Brent Blumenstein, PhD                                                   |                          |
| Gerald Chodak, MD                                                        |                          |
| James Eastham, MD                                                        |                          |
| Joseph Jacobson, MD                                                      |                          |
| Charles Johnson, MD                                                      |                          |
| Richard Kaplan, MD                                                       |                          |

|                                                                                       |                                |
|---------------------------------------------------------------------------------------|--------------------------------|
| Peter Scardino, MD                                                                    |                                |
| Ian Thompson, MD                                                                      |                                |
| David Weiss, PhD                                                                      |                                |
| <b>PIVOT Data Safety and Monitoring Board (*members at close of study, †deceased)</b> |                                |
| John Concato, M.D.*                                                                   |                                |
| Allan Donner, Ph.D.*                                                                  |                                |
| Joel Greenhouse, Ph.D.*                                                               |                                |
| Paul Lange, M.D. (Chairman)*                                                          |                                |
| Nick Vogelzang, M.D.*                                                                 |                                |
| Steven Woloshin, M.D.*                                                                |                                |
| Warren Browner, M.D.                                                                  |                                |
| Martin Resnick, M.D.†                                                                 |                                |
| Nelda Wray, M.D.                                                                      |                                |
| <b>PARTICIPATING PIVOT SITES</b>                                                      |                                |
| <b>National Cancer Institute</b>                                                      |                                |
| Cancer Therapy Evaluation Program                                                     |                                |
| <b>Senior Investigator</b>                                                            | Richard Kaplan, MD             |
| <b>Eastern Cooperative Oncology Group (ECOG)</b>                                      |                                |
| Clinical Trials Manager                                                               | Renee Young                    |
| Study Group Coordinator                                                               | Timothy Moon, MD               |
| Biostatistician                                                                       | Kathleen Propert, Sc.D.        |
| Protocol Coordinator                                                                  | Dorothy Brier                  |
| <b>University of Florida – Jacksonville, FL</b>                                       |                                |
| Investigator                                                                          | Howard Epstein, MD             |
| Study Coordinator                                                                     | Debbie Flemming, RN, BSN, CCRN |
| <b>Allegheny University – Allegheny, PA</b>                                           |                                |
| Investigator                                                                          | Daniel Rukstalis, MD           |
| <b>MCP-Hahnemann - Philadelphia, PA</b>                                               |                                |
| Investigator                                                                          | Daniel Rukstalis, MD           |
| <b>Southwest Oncology Group (SWOG) Sites</b>                                          |                                |
| Study Group Coordinator                                                               | Daniel Culkin, MD              |
| Biostatistician                                                                       | Danika Lew                     |
| Protocol Coordinator                                                                  | Francine Fuentes               |
| Data Coordination                                                                     | Kathy Sears                    |
| <b>University of Alabama – Birmingham, AL</b>                                         |                                |
| Investigator                                                                          | Donald Urban, MD               |
| Study Coordinator                                                                     | Doreen Perkins, RN, MSN        |
| <b>Brooke Army Medical Center / Wilford Hall Medical Center - Ft. Sam Houston, TX</b> |                                |
| Investigator                                                                          | Ian Thompson Jr, MD            |
|                                                                                       | Mitchell Garrison, MD          |
|                                                                                       | Christopher Graham, MD         |
| Co-Investigator                                                                       | Carolyn Masserello, CCRP       |
| Study Coordinator                                                                     | Christine Johnson, RN, CCRP    |
|                                                                                       | Betsy Higgins, CCRA            |
|                                                                                       | Judy Bolton, RN                |
| <b>Henry Ford Hospital - Detroit, MI</b>                                              |                                |
| Investigator                                                                          | James Peabody, MD              |
| Co-Investigator                                                                       | Hans Stricker, MD              |
| Study Coordinator                                                                     | Connie Harkness                |

|                                                                          |                          |
|--------------------------------------------------------------------------|--------------------------|
|                                                                          | Susan Berry, RN, BSN     |
|                                                                          | Charles Leister          |
| <b>University of Oklahoma – Oklahoma City, OK</b>                        |                          |
| Investigator                                                             | Daniel Culkin, MD        |
| <b>University of New Mexico -</b>                                        |                          |
| Investigator                                                             | Anthony Smith, MD        |
| Study Coordinator                                                        | Darlene Harbour, RN      |
| <b>Veterans Affairs Medical Center Sites</b>                             |                          |
| <b>Albany Veterans Affairs Medical Center - Albany, NY (500)</b>         |                          |
| Investigator                                                             | Badar Mian, MD           |
|                                                                          | Harry Wilbur, MD         |
|                                                                          | William Hrushesky, MD    |
| Study Coordinator                                                        | Elissa Ball, RN, CCRP    |
|                                                                          | James Holland, MD        |
|                                                                          | Paul Kormak, MD          |
| <b>Amarillo Veterans Affairs Medical Center - Amarillo, TX (504)</b>     |                          |
| Investigator/Coordinator                                                 | Kent Wilkins, PA         |
|                                                                          | William Bordelon, MD     |
| <b>Ann Arbor Veterans Affairs Medical Center - Ann Arbor, MI (506)</b>   |                          |
| Investigator                                                             | John Wei, MD             |
|                                                                          | Mary Gail Blasier, MD    |
|                                                                          | Karen Belanger, MS, RD   |
| Study Coordinator                                                        | Todd Morningstar, RN     |
|                                                                          | Katherine Gravlin, RN    |
| <b>Bay Pines Veterans Affairs Medical Center – Bay Pines, FL (516)</b>   |                          |
| Investigator                                                             | Perry Hudson, MD         |
| Study Coordinator                                                        | Joe Zeigler, RN          |
| <b>Birmingham Veterans Affairs Medical Center - Birmingham, AL (521)</b> |                          |
| Investigator                                                             | Janet Colli, MD          |
| Co-Investigator                                                          | Donald Urban, MD         |
| Nurse Coordinator                                                        | Pat Woodward, RN, MSN    |
| Study Coordinator                                                        | Constance Moore, RN, MSN |
| <b>West Roxbury Veterans Affairs Medical Center – Boston, MA (525)</b>   |                          |
| Investigator                                                             | Subbarao Yalla, MD       |
|                                                                          | Sanjaya Kumar, MD        |
| Study Coordinator                                                        | Nina Kilimnik, RN, NP    |
| <b>Bronx Veterans Affairs Medical Center - Bronx, NY (526)</b>           |                          |
| Investigator                                                             | Glen McWilliams, MD      |
|                                                                          | Vincent Ciavarra, MD     |
| Co-Investigator                                                          | Thomas Grimaldi, MD      |
| Study Coordinator                                                        | Catherine Martyn         |
|                                                                          | Gregory Martyn           |
| <b>Brooklyn Veterans Affairs Medical Center - Brooklyn, NY (527)</b>     |                          |
| Investigator                                                             | William Blank, MD        |
| Study Coordinator                                                        | JoAnn Comas, RN, MSN     |
| <b>Buffalo Veterans Affairs Medical Center - Buffalo, NY (528)</b>       |                          |
| Investigator                                                             | Ruben Cartagena, MD      |
|                                                                          | Thomas Grimaldi, MD      |
| Study Coordinator                                                        | Elongia Farrell, BA      |

|                                                                              |                             |
|------------------------------------------------------------------------------|-----------------------------|
|                                                                              | Nancy Evans, RN             |
| <b>Boise Veterans Affairs Medical Center – Boise, ID (531)</b>               |                             |
| Investigator                                                                 | E. Manley Briggs, MD        |
| Co-Investigator                                                              | C. Scott Smith, MD          |
|                                                                              | Beverly Parker, MD          |
| Study Coordinator                                                            | Ilse Herrera, NP, MSN       |
|                                                                              | Carlene Ouellette, RNC, FNP |
| <b>Westside-Chicago Veterans Affairs Medical Center – Chicago, IL (537)</b>  |                             |
| Investigator                                                                 | Roohollah Sharifi, MD       |
| Study Coordinator                                                            | Zhigang Wu, MD              |
|                                                                              | Keith Hering, RN            |
| <b>Clarksburg Veterans Affairs Medical Center - Clarksburg, WV (540)</b>     |                             |
| Investigator                                                                 | Glenn Snider, MD            |
| Co-Investigator                                                              | Kathy Ross, NP              |
|                                                                              | Douglas McKinney, MD        |
|                                                                              | Antonio Mataban, MD         |
| Study Coordinator                                                            | Gena Nelson, RN, BSN        |
| <b>Dallas Veterans Affairs Medical Center – Dallas, TX (549)</b>             |                             |
| Investigator                                                                 | Claus Roehrborn, MD         |
| Co-Investigator                                                              | Key Stage, MD               |
|                                                                              | Dona Nomamiukor, MD         |
| Study Coordinator                                                            | Allison Ahrens Beaver, RN   |
|                                                                              | Beth Petty, RN              |
|                                                                              | Cyenthia Willis, RN         |
|                                                                              | Elie Benaim, MD             |
| <b>East Orange Veterans Affairs Medical Center – East Orange, NJ (561)</b>   |                             |
| Investigator                                                                 | Patricia Gilhooly, MD, FACS |
| Study Coordinator                                                            | Linda Perrine, RN           |
|                                                                              | Karen Long, RN, MSN, NP-C   |
| <b>Hines Veterans Affairs Medical Center – Maywood, IL (578)</b>             |                             |
| Investigator                                                                 | Robert Flanigan, MD         |
| Co-Investigator                                                              | Steven Campbell, MD         |
|                                                                              | W. Bedford Waters, MD       |
| Study Coordinator                                                            | Mary Abuja                  |
|                                                                              | Susan Garrett, RN, BS       |
| <b>Houston Veterans Affairs Medical Center – Houston, TX (580)</b>           |                             |
| Investigator                                                                 | Brian Miles, MD             |
|                                                                              | Jeffery Jones, MD           |
| Study Coordinator                                                            | Priscilla Miller, RN        |
| <b>Indianapolis Veterans Affairs Medical Center – Indianapolis, IN (583)</b> |                             |
| Investigator                                                                 | Richard Foster, MD          |
| Study Coordinator                                                            | Rhoda Loman                 |
|                                                                              | Linda Faulkner, RN          |
|                                                                              | Janis Aichinger, RN         |
|                                                                              | Debra Coleman, RN           |
| <b>Iowa City Veterans Affairs Medical Center – Iowa City, IA (584)</b>       |                             |
| Investigator                                                                 | Bernard Fallon, MD          |
| Study Coordinator                                                            | Deanna Ireland, RN, BSN     |



|                                                                                |                                 |
|--------------------------------------------------------------------------------|---------------------------------|
| <b>Kansas City Veterans Affairs Medical Center – Kansas City, KS (589)</b>     |                                 |
| Study Coordinator                                                              | Sue Reeves, RN                  |
| <b>Hampton Veterans Affairs Medical Center – Hampton, VA (590)</b>             |                                 |
| Investigator                                                                   | Young Kwon, MD                  |
|                                                                                | I.C. Vernon Netto, MD           |
|                                                                                | Kathy Goodman, MD               |
| Study Coordinator                                                              | Debra Overton, RN               |
|                                                                                | Mary Dalton, RN                 |
| <b>Lake City Veterans Affairs Medical Center – Lake City, FL (594)</b>         |                                 |
| Investigator                                                                   | Giora Katz, MD                  |
| <b>Lexington Veterans Affairs Medical Center – Lexington, KY (596)</b>         |                                 |
| Investigator                                                                   | Randall Rowland, MD, PhD        |
| Co-Investigator                                                                | Roger Fleishman, MD             |
| Study Coordinator                                                              | Marietta Barton-Baxter, CCRC    |
|                                                                                | Maryrose Martin                 |
| <b>Little Rock Veterans Affairs Medical Center – Little Rock, AK (598)</b>     |                                 |
| Investigator                                                                   | Nabil Bissada, MD               |
|                                                                                | Udaya Kumar, MD                 |
|                                                                                | Donald Johnson, MD              |
| Study Coordinator                                                              | Lynne Vinson, MPH, CRA          |
| <b>Long Beach Veterans Affairs Medical Center – Long Beach, CA (600)</b>       |                                 |
| Investigator                                                                   | Padmini Iyer, MD                |
|                                                                                | Gordon McLaren, MD              |
| Study Coordinator                                                              | Francoise Toussaint-Jones       |
| <b>Madison Veterans Affairs Medical Center – Madison, WI (607)</b>             |                                 |
| Investigator                                                                   | Timothy Moon, MD                |
| Study Coordinator                                                              | Janice Reider, RN               |
|                                                                                | Mary Jane Staab, RN             |
|                                                                                | Rhoda Azroomanian, RN           |
| <b>Memphis Veterans Affairs Medical Center – Memphis, TN (614)</b>             |                                 |
| Investigator                                                                   | Anthony Patterson, MD           |
| Study Coordinator                                                              | Cindy Herrington                |
|                                                                                | Annette Laulederkind, BSN, CCRC |
|                                                                                | Michele Schiffer, RN            |
| <b>Nashville Veterans Affairs Medical Center – Nashville, TN (626)</b>         |                                 |
| Investigator                                                                   | Michael Cookson, MD             |
| Study Coordinator                                                              | Pam Graham, RN                  |
| <b>Oklahoma City Veterans Affairs Medical Center – Oklahoma City, OK (635)</b> |                                 |
| Investigator                                                                   | Daniel Culkin, MD               |
| Study Coordinator                                                              | Vickie Phillips, RN             |
|                                                                                | Sharon Fisher, RN               |
|                                                                                | Ladonna Foster, RN, LNC         |
| <b>Palo Alto Veterans Affairs Medical Center – Palo Alto, CA (640)</b>         |                                 |
| Investigator                                                                   | Martha Terris, MD               |
| Study Coordinator                                                              | Marie Macy, RNP                 |
| <b>Pittsburgh Veterans Affairs Medical Center – Pittsburgh, PA (646)</b>       |                                 |
| Investigator                                                                   | Jeffrey Gingrich, MD            |
|                                                                                | Thomas Hakala, MD               |
| Study Coordinator                                                              | Stephanie Zotter                |

|                                                                                |                                |
|--------------------------------------------------------------------------------|--------------------------------|
|                                                                                | Nina Peterson, RN              |
|                                                                                | Dawn Lea, RN                   |
| <b>Portland Veterans Affairs Medical Center – Portland, OR (648)</b>           |                                |
| Investigator                                                                   | Mark Garzotto, MD              |
|                                                                                | Thomas Klein, MD               |
| Study Coordinator                                                              | Laura Peters, RN               |
| <b>Providence Veterans Affairs Medical Center – Providence, RI (650)</b>       |                                |
| Investigator                                                                   | Robert Plante, NP, MSN         |
|                                                                                | August Zabbo, MD               |
| Study Coordinator                                                              | Eileen Gray                    |
| <b>Richmond Veterans Affairs Medical Center – Richmond, VA (652)</b>           |                                |
| Investigator                                                                   | Mayer Grob, MD                 |
| Study Coordinator                                                              | Judy Craggs, RN                |
|                                                                                | Lisa Smith, RN                 |
| <b>San Francisco Veterans Affairs Medical Center – San Francisco, CA (662)</b> |                                |
| Investigator                                                                   | Badrinath Konety, MD           |
|                                                                                | Christopher Kane, MD           |
|                                                                                | Joseph Presti, MD              |
|                                                                                | Paul Turek, MD                 |
| Study Coordinator                                                              | Evelyn Badua, MD               |
| <b>Seattle Veterans Affairs Medical Center – Seattle, WA (663)</b>             |                                |
| Investigator                                                                   | Claire Yang, MD                |
|                                                                                | John Corman, MD                |
|                                                                                | David Penson, MD               |
| Study Coordinator                                                              | Judith Senstrom, LPN, BA, CCRC |
|                                                                                | Megan Meyers-Hummel, RN        |
| <b>Sepulveda Veterans Affairs Medical Center – Los Angeles (665)</b>           |                                |
| Investigator                                                                   | William Aronson, MD            |
| Study Coordinator                                                              | Sherry Jeffery                 |
|                                                                                | Terry Saltzman, RN             |
| <b>Shreveport Veterans Affairs Medical Center – Shreveport, LA (667)</b>       |                                |
| Investigator                                                                   | Murali Ankem, MD               |
|                                                                                | James Eastman, MD              |
|                                                                                | Donald Elmajian, MD            |
| Study Coordinator                                                              | John Robertson, RN             |
| <b>Syracuse Veterans Affairs Medical Center – Syracuse, NY (670)</b>           |                                |
| Investigator                                                                   | Imad Nsouli, MD                |
|                                                                                | Dennis Krauss, MD              |
| Study Coordinator                                                              | Kathleen Albright              |
|                                                                                | Patricia Edmonds               |
|                                                                                | Amy MacArthur                  |
|                                                                                | Colleen Drake                  |
| <b>San Antonio Veterans Affairs Medical Center – San Antonio, TX (671)</b>     |                                |
| Investigator                                                                   | Joseph Basler, MD, PhD         |
|                                                                                | Geoffrey Weiss, MD             |
| Study Coordinator                                                              | Dendra von Mervedt, RN, MSN    |
|                                                                                | Carol Jenkins, RN, MS          |
| <b>Tampa Veterans Affairs Medical Center – Tampa, FL (673)</b>                 |                                |
| Investigator                                                                   | Raoul Salup, MD                |

|                                                                                 |                                 |
|---------------------------------------------------------------------------------|---------------------------------|
|                                                                                 | Raul Ordorica, MD               |
| Study Coordinator                                                               | Jaswantrai Trivedi, MD          |
| <b>Temple Veterans Affairs Medical Center – Temple, TX (674)</b>                |                                 |
| Investigator                                                                    | Parikshit Pandya, MD            |
|                                                                                 | Charles Johnson, MD             |
|                                                                                 | John Wurster, MD,FACS           |
| Study Coordinator                                                               | Patricia Hermsen, RN, BSN       |
|                                                                                 | Robert Massey, RN               |
|                                                                                 | Bridget Wiley                   |
| <b>West Los Angeles Veterans Affairs Medical Center – Los Angeles, CA (691)</b> |                                 |
| Investigator                                                                    | Carol Bennett, MD               |
|                                                                                 | William Aronson, MD             |
| Study Coordinator                                                               | Sherry Jeffery                  |
|                                                                                 | Chela-Rene Spaargaren, BS, CCRA |
|                                                                                 | Michelle Dominguez              |
|                                                                                 | Francisco Conde, RN, MSN        |
